# Supplementary material for: Synthesis of spiro[4.4]thiadiazole derivatives via double 1,3-dipolar cycloaddition of hydrazonyl chlorides with carbon disulfide
Source: Royal Society of Chemistry journal article supplement (doi:10.1039/d1ra03229a), 2021-01-01

# Synthesis of spiro[4.4]thiadiazole derivatives via double 1,3-dipolar cycloaddition of hydrazonyl chlorides with carbon disulfide

Kai-Kai Wang <sup>a</sup>, Yan-Li Li <sup>b</sup>, Dong-Guang Guo <sup>c</sup>, Peng-Tao Pan <sup>b</sup>, Aili Sun <sup>a,\*</sup>, Rongxiang Chen<sup>a,\*</sup>

<sup>a</sup> School of Pharmacy and Key Laboratory of Nano-carbon Modified Film Technology Engineering of Henan Province, Xinxiang 453000, P.R. of China

<sup>b</sup> Medical College, Xinxiang University, Xinxiang 453000, P.R. of China

<sup>c</sup> School of Life Sciences and Basic Medicine, Xinxiang University, Xinxiang 453000, P.R. of China

## Supporting Information

### Table of contents

|                                                                                          |   |
|------------------------------------------------------------------------------------------|---|
| <b>1. General methods</b> .....                                                          | 2 |
| <b>2. General procedure for the synthesis of spiro[4.4]thiadiazole derivatives</b> ..... | 2 |
| <b>3. Crystal data and structural refinement for 3h</b> .....                            | 5 |
| <b>4. Copies of NMR spectra</b> .....                                                    | 7 |

---

\* Corresponding author.

*E-mail address:* chenhlmei@163.com

*E-mail address:* sunailify@126.com

## 1. General methods

NMR data were obtained for  $^1\text{H}$  at 400 MHz, and for  $^{13}\text{C}$  at 100 MHz. Chemical shifts were given in parts per million ( $\delta$ ) from tetramethylsilane with the solvent resonance as the internal standard in  $\text{CDCl}_3$  solution. Data were reported as follows: chemical shift, multiplicity (s = singlet, d = doublet, t = triplet, q = quartet, m = multiplet), coupling constants (Hz), integration. ESI HRMS was recorded on a Waters SYNAPT G2. Column chromatography was performed on silica gel (200-300 mesh) eluting with ethyl acetate and petroleum ether. TLC was performed on glass-backed silica plates. UV light,  $\text{I}_2$ , and solution of potassium permanganate were used to visualize products. All chemicals were used without purification as commercially available unless otherwise noted. Petroleum ether (PE) and ethyl acetate (EtOAc) were distilled. THF was freshly distilled from sodium/benzophenone. Unless otherwise noted, experiments involving moisture and/or air sensitive components were performed under a positive pressure of argon in oven-dried glassware equipped with a rubber septum inlet. Dried solvents and liquid reagents were transferred by oven-dried syringes. The hydrazone chlorides **1** were prepared according to the literature procedures [1].

- [1] (a) Wang, G.; Liu, X.; Huang, T.; Kuang, Y.; Lin, L.; Feng, X., *Org. Lett.* **2013**, *15*, 76-79; (b) Sibi, M. P.; Stanley, L. M.; Soeta, T., *Adv. Synth. Catal.* **2006**, *348*, 2371-2375; (c) Su, Y.; Zhao, Y.; Chang, B.; Zhao, X.; Zhang, R.; Liu, X.; Huang, D.; Wang, K.-H.; Huo, C.; Hu, Y., *J. Org. Chem.* **2019**, *84*, 6719-6728; (d) Voronin, V. V.; Ledovskaya, M. S.; Gordeev, E. G.; Rodygin, K. S.; Ananikov, V. P., *J. Org. Chem.* **2018**, *83*, 3819-3828; (e) Liu, H.; Jia, H.; Wang, B.; Xiao, Y.; Guo, H., *Org. Lett.* **2017**, *19*, 4714-4717.

## 2. General procedure for the synthesis of spiro[4.4]thiadiazole derivatives

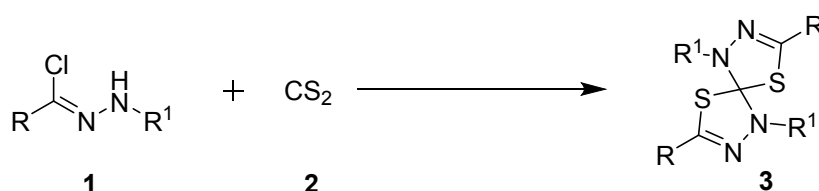

The nitrile imine precursor of the hydrazone chlorides **1** (0.2 mmol), carbon disulfide **2** (0.3 mmol), and the cesium carbonate (0.2 mmol) were dissolved in  $\text{CH}_2\text{Cl}_2$  (1.0 mL). Then the solution was stirred at rt for 12 h. After completion, the mixture was directly purified by column chromatography on silica gel eluting with petroleum ether/ethyl acetate (50:1 to 25:1) to afford the product **3**.

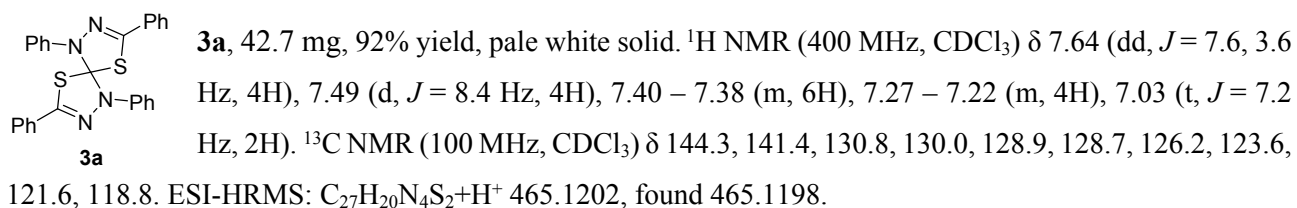

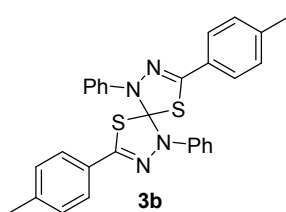

**3b**, 44.3 mg, 90% yield, pale white solid.  $^1\text{H}$  NMR (400 MHz,  $\text{CDCl}_3$ )  $\delta$  7.53 (d,  $J$  = 8.0 Hz, 4H), 7.47 (d,  $J$  = 8.4 Hz, 4H), 7.25 – 7.18 (m, 8H), 7.00 (t,  $J$  = 7.6 Hz, 2H), 2.36 (s, 6H).  $^{13}\text{C}$  NMR (100 MHz,  $\text{CDCl}_3$ )  $\delta$  144.4, 141.5, 140.3, 129.4, 128.8, 128.0, 126.1, 123.3, 121.3, 118.6, 21.4. ESI-HRMS:  $\text{C}_{29}\text{H}_{24}\text{N}_4\text{S}_2+\text{H}^+$  493.1515, found 493.1510.

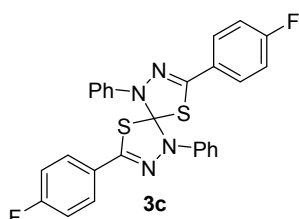

**3c**, 47.5 mg, 95% yield, pale white solid.  $^1\text{H}$  NMR (400 MHz,  $\text{CDCl}_3$ )  $\delta$  7.62 (dd,  $J$  = 8.8, 5.2 Hz, 4H), 7.47 (d,  $J$  = 7.6 Hz, 4H), 7.28 – 7.24 (m, 4H), 7.11 – 7.03 (m, 6H).  $^{13}\text{C}$  NMR (100 MHz,  $\text{CDCl}_3$ )  $\delta$  163.7 (d,  $J$  = 249.6 Hz), 143.4, 141.3, 128.9, 128.0 (d,  $J$  = 8.3 Hz), 127.0 (d,  $J$  = 3.3 Hz), 123.8, 122.4, 118.9, 115.9 (d,  $J$  = 22.2 Hz). ESI-HRMS:  $\text{C}_{27}\text{H}_{18}\text{F}_2\text{N}_4\text{S}_2+\text{H}^+$  501.1014, found 501.1009.

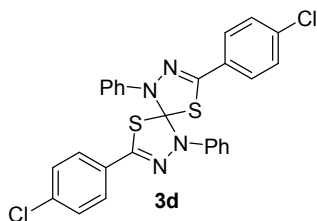

**3d**, 50.0 mg, 94% yield, pale white solid.  $^1\text{H}$  NMR (400 MHz,  $\text{CDCl}_3$ )  $\delta$  7.55 (d,  $J$  = 8.4 Hz, 4H), 7.45 (d,  $J$  = 8.0 Hz, 4H), 7.36 (d,  $J$  = 8.4 Hz, 4H), 7.28 – 7.24 (m, 4H), 7.06 (t,  $J$  = 7.2 Hz, 2H).  $^{13}\text{C}$  NMR (100 MHz,  $\text{CDCl}_3$ )  $\delta$  143.2, 141.2, 135.9, 129.2, 128.98, 128.96, 127.3, 123.9, 122.2, 119.0. ESI-HRMS:  $\text{C}_{27}\text{H}_{18}\text{Cl}_2\text{N}_4\text{S}_2+\text{H}^+$  533.0423, found 533.0416.

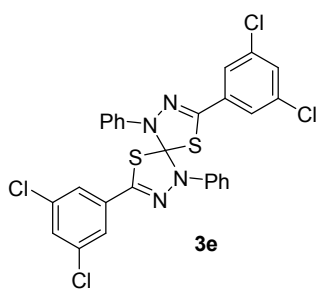

**3e**, 56.0 mg, 93% yield, pale white solid.  $^1\text{H}$  NMR (400 MHz,  $\text{CDCl}_3$ )  $\delta$  7.49 (s, 4H), 7.43 (d,  $J$  = 8.8 Hz, 4H), 7.37 (s, 2H), 7.30 (t,  $J$  = 7.6 Hz, 4H), 7.11 (t,  $J$  = 7.2 Hz, 2H).  $^{13}\text{C}$  NMR (100 MHz,  $\text{CDCl}_3$ )  $\delta$  141.6, 140.8, 135.5, 133.4, 129.7, 129.1, 124.6, 124.3, 122.9, 119.4. ESI-HRMS:  $\text{C}_{27}\text{H}_{18}\text{Cl}_2\text{N}_4\text{S}_2+\text{H}^+$  600.9643, found 600.9639.

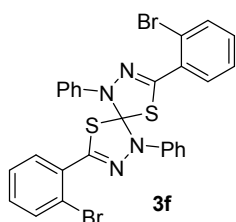

**3f**, 58.8 mg, 95% yield, pale white solid.  $^1\text{H}$  NMR (400 MHz,  $\text{CDCl}_3$ )  $\delta$  7.68 – 7.64 (m, 4H), 7.49 (d,  $J$  = 8.4 Hz, 4H), 7.35 (t,  $J$  = 7.6 Hz, 2H), 7.30 – 7.22 (m, 6H), 7.06 (t,  $J$  = 7.6 Hz, 2H).  $^{13}\text{C}$  NMR (100 MHz,  $\text{CDCl}_3$ )  $\delta$  142.3, 141.1, 134.2, 131.4, 130.85, 130.83, 128.9, 127.5, 123.7, 121.5, 121.3, 119.0. ESI-HRMS:  $\text{C}_{27}\text{H}_{18}\text{Br}_2\text{N}_4\text{S}_2+\text{H}^+$  622.9392, found 622.9383.

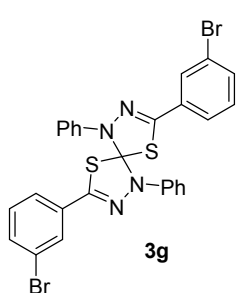

**3g** 59.4 mg, 96% yield, pale white solid.  $^1\text{H}$  NMR (400 MHz,  $\text{CDCl}_3$ )  $\delta$  7.83 (s, 2H), 7.50 – 7.44 (m, 8H), 7.29 – 7.25 (m, 4H), 7.23 – 7.21 (m, 2H), 7.06 (t,  $J = 7.2$  Hz, 2H).  $^{13}\text{C}$  NMR (100 MHz,  $\text{CDCl}_3$ )  $\delta$  142.8, 141.1, 132.9, 132.7, 130.3, 129.1, 128.8, 124.9, 124.2, 123.0, 122.3, 119.2. ESI-HRMS:  $\text{C}_{27}\text{H}_{18}\text{Br}_2\text{N}_4\text{S}_2 + \text{H}^+$  622.9392, found 620.9384.

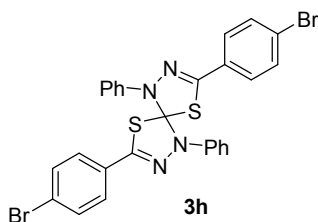

**3h**, 58.8 mg, 95% yield, pale white solid.  $^1\text{H}$  NMR (400 MHz,  $\text{CDCl}_3$ )  $\delta$  7.54 – 7.44 (m, 12H), 7.28 – 7.24 (m, 4H), 7.06 (t,  $J = 7.6$  Hz, 2H).  $^{13}\text{C}$  NMR (100 MHz,  $\text{CDCl}_3$ )  $\delta$  143.3, 141.1, 131.9, 129.6, 129.0, 127.5, 124.1, 124.0, 122.2, 119.0. ESI-HRMS:  $\text{C}_{27}\text{H}_{18}\text{Br}_2\text{N}_4\text{S}_2 + \text{H}^+$  622.9392, found 622.9384.

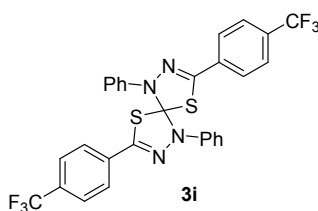

**3i**, 56.4 mg, 94% yield, pale white solid.  $^1\text{H}$  NMR (400 MHz,  $\text{CDCl}_3$ )  $\delta$  7.73 (d,  $J = 8.0$  Hz, 4H), 7.65 (d,  $J = 8.4$  Hz, 4H), 7.47 (d,  $J = 8.0$  Hz, 4H), 7.28 (t,  $J = 7.2$  Hz, 4H), 7.09 (t,  $J = 7.2$  Hz, 2H).  $^{13}\text{C}$  NMR (100 MHz,  $\text{CDCl}_3$ )  $\delta$  142.8, 141.0, 134.0, 131.6 (q,  $J = 32.5$  Hz), 129.1, 126.3, 125.8 (q,  $J = 3.7$  Hz), 125.1, 124.4, 122.5, 121.3 (q,  $J = 220.3$  Hz), 119.3. ESI-HRMS:  $\text{C}_{29}\text{H}_{18}\text{F}_6\text{N}_4\text{S}_2 + \text{H}^+$  601.0950, found 601.0942.

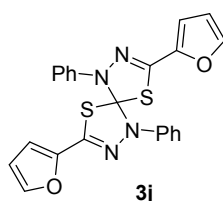

**3j**, 40.4 mg, 91% yield, pale white solid.  $^1\text{H}$  NMR (400 MHz,  $\text{CDCl}_3$ )  $\delta$  7.48 – 7.45 (m, 6H), 7.28 – 7.24 (m, 4H), 7.05 (t,  $J = 7.2$  Hz, 2H), 6.70 (d,  $J = 3.2$  Hz, 2H), 6.49 – 6.48 (m, 2H).  $^{13}\text{C}$  NMR (100 MHz,  $\text{CDCl}_3$ )  $\delta$  145.2, 143.9, 141.3, 135.8, 129.0, 124.0, 119.5, 111.9, 110.3. ESI-HRMS:  $\text{C}_{23}\text{H}_{16}\text{N}_4\text{O}_2\text{S}_2 + \text{H}^+$  445.0787, found 445.0783.

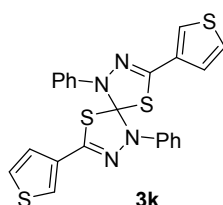

**3k**, 44.3 mg, 93% yield, pale white solid.  $^1\text{H}$  NMR (400 MHz,  $\text{CDCl}_3$ )  $\delta$  7.50 – 7.45 (m, 6H), 7.38 – 7.34 (m, 4H), 7.28 – 7.24 (m, 4H), 7.04 (t,  $J = 7.2$  Hz, 2H).  $^{13}\text{C}$  NMR (100 MHz,  $\text{CDCl}_3$ )  $\delta$  141.4, 140.2, 132.6, 128.9, 126.7, 125.2, 124.5, 123.6, 121.8, 118.9. ESI-HRMS:  $\text{C}_{23}\text{H}_{16}\text{N}_4\text{S}_4 + \text{H}^+$  477.0331, found 477.0326.

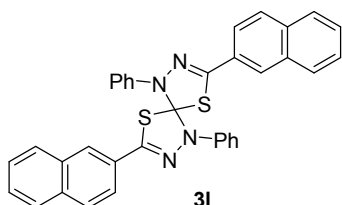

**3l**, 53.6 mg, 95% yield, pale white solid.  $^1\text{H}$  NMR (400 MHz,  $\text{CDCl}_3$ )  $\delta$  8.12 – 7.99 (m, 2H), 7.88 (s, 1H), 7.85 – 7.80 (m, 7H), 7.56 (d,  $J = 8.0$  Hz, 4H), 7.49 (dd,  $J = 7.6, 3.6$  Hz, 4H), 7.28 (d,  $J = 7.6$  Hz, 3H), 7.23 (s, 1H), 7.04 (t,  $J = 7.2$

Hz, 2H).  $^{13}\text{C}$  NMR (100 MHz,  $\text{CDCl}_3$ )  $\delta$  144.4, 141.4, 134.0, 133.0, 129.0, 128.5, 128.31, 128.27, 127.9, 127.1, 126.8, 126.5, 123.7, 122.8, 121.4, 118.9. ESI-HRMS:  $\text{C}_{35}\text{H}_{24}\text{N}_4\text{S}_2+\text{H}^+$  565.1515, found 565.1510.

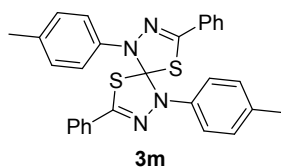

**3m**, 44.3 mg, 90% yield, pale white solid.  $^1\text{H}$  NMR (400 MHz,  $\text{CDCl}_3$ )  $\delta$  7.64 – 7.62 (m, 4H), 7.40 – 7.38 (m, 10H), 7.06 (d,  $J = 8.4$  Hz, 4H), 2.26 (s, 6H).  $^{13}\text{C}$  NMR (100 MHz,  $\text{CDCl}_3$ )  $\delta$  143.9, 139.1, 133.3, 131.0, 129.8, 129.5, 128.7, 126.1, 122.4, 119.1, 20.7. ESI-HRMS:  $\text{C}_{29}\text{H}_{24}\text{N}_4\text{S}_2+\text{H}^+$  493.1515, found 493.1512.

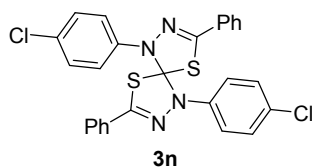

**3n**, 49.5 mg, 93% yield, pale white solid.  $^1\text{H}$  NMR (400 MHz,  $\text{CDCl}_3$ )  $\delta$  7.64 – 7.62 (m, 4H), 7.42 – 7.41 (m, 6H), 7.38 – 7.36 (m, 4H), 7.24 – 7.20 (m, 4H).  $^{13}\text{C}$  NMR (100 MHz,  $\text{CDCl}_3$ )  $\delta$  145.0, 139.7, 130.4, 130.3, 129.0, 128.8, 126.2, 120.9, 119.7. ESI-HRMS:  $\text{C}_{27}\text{H}_{18}\text{Cl}_2\text{N}_4\text{S}_2+\text{H}^+$  533.0423, found 533.0421.

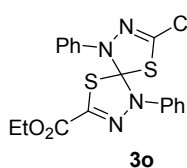

**3o**, 41.5 mg, 91% yield, pale white solid.  $^1\text{H}$  NMR (400 MHz,  $\text{CDCl}_3$ )  $\delta$  7.37 (d,  $J = 8.0$  Hz, 4H), 7.31 (t,  $J = 7.8$  Hz, 4H), 7.18 (t,  $J = 7.2$  Hz, 2H), 4.35 (q,  $J = 6.4$  Hz, 4H), 1.36 (t,  $J = 7.2$  Hz, 6H).  $^{13}\text{C}$  NMR (100 MHz,  $\text{CDCl}_3$ )  $\delta$  159.6, 140.1, 135.9, 129.3, 125.9, 123.2, 120.9, 62.7, 14.2. ESI-HRMS:  $\text{C}_{21}\text{H}_{20}\text{N}_4\text{O}_4\text{S}_2+\text{H}^+$  457.0999, found 457.0990.

### 3. Crystal data and structural refinement for **3h**

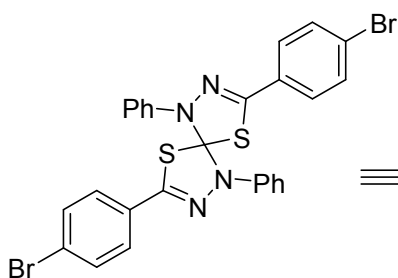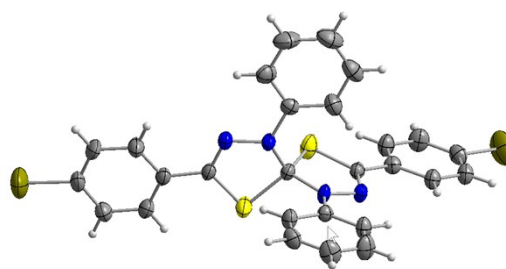

**CCDC 2041891**

|                     |                                                             |
|---------------------|-------------------------------------------------------------|
| Identification code | <b>3h</b>                                                   |
| Empirical formula   | $\text{C}_{27}\text{H}_{18}\text{Br}_2\text{N}_4\text{S}_2$ |
| Formula weight      | 622.39                                                      |
| Temperature/K       | 273                                                         |
| Crystal system      | triclinic                                                   |
| Space group         | P -1 (2)                                                    |

|                                             |                                                                |
|---------------------------------------------|----------------------------------------------------------------|
| a/Å                                         | 7.8533(10)                                                     |
| b/Å                                         | 11.2055(14)                                                    |
| c/Å                                         | 14.9614(18)                                                    |
| $\alpha$ /°                                 | 109.965(2)                                                     |
| $\beta$ /°                                  | 95.868(2)                                                      |
| $\gamma$ /°                                 | 95.134(2)                                                      |
| Volume/Å <sup>3</sup>                       | 1220.1(3)                                                      |
| Z                                           | 2                                                              |
| $\rho_{\text{calc}}$ /cm <sup>3</sup>       | 1.694                                                          |
| $\mu$ /mm <sup>-1</sup>                     | 3.519                                                          |
| F(000)                                      | 620.0                                                          |
| Crystal size/mm <sup>3</sup>                | 0.26 × 0.25 × 0.24                                             |
| Radiation                                   | MoK $\alpha$ ( $\lambda$ = 0.71073)                            |
| 2 $\Theta$ range for data collection/°      | 2.823 to 24.999                                                |
| Index ranges                                | -9 ≤ h ≤ 9, -11 ≤ k ≤ 13, -16 ≤ l ≤ 17                         |
| Reflections collected                       | 6270                                                           |
| Independent reflections                     | 3282 [ $R_{\text{int}}$ = 0.0423, $R_{\text{sigma}}$ = 0.0222] |
| Data/restraints/parameters                  | 4262/0/316                                                     |
| Goodness-of-fit on F <sup>2</sup>           | 0.947                                                          |
| Final R indexes [ $I \geq 2\sigma(I)$ ]     | $R_1$ = 0.0333, $wR_2$ = 0.0863                                |
| Final R indexes [all data]                  | $R_1$ = 0.0518, $wR_2$ = 0.0924                                |
| Largest diff. peak/hole / e Å <sup>-3</sup> | 0.469/ -0.546 / 0.089                                          |

## 4. Copies of NMR spectra

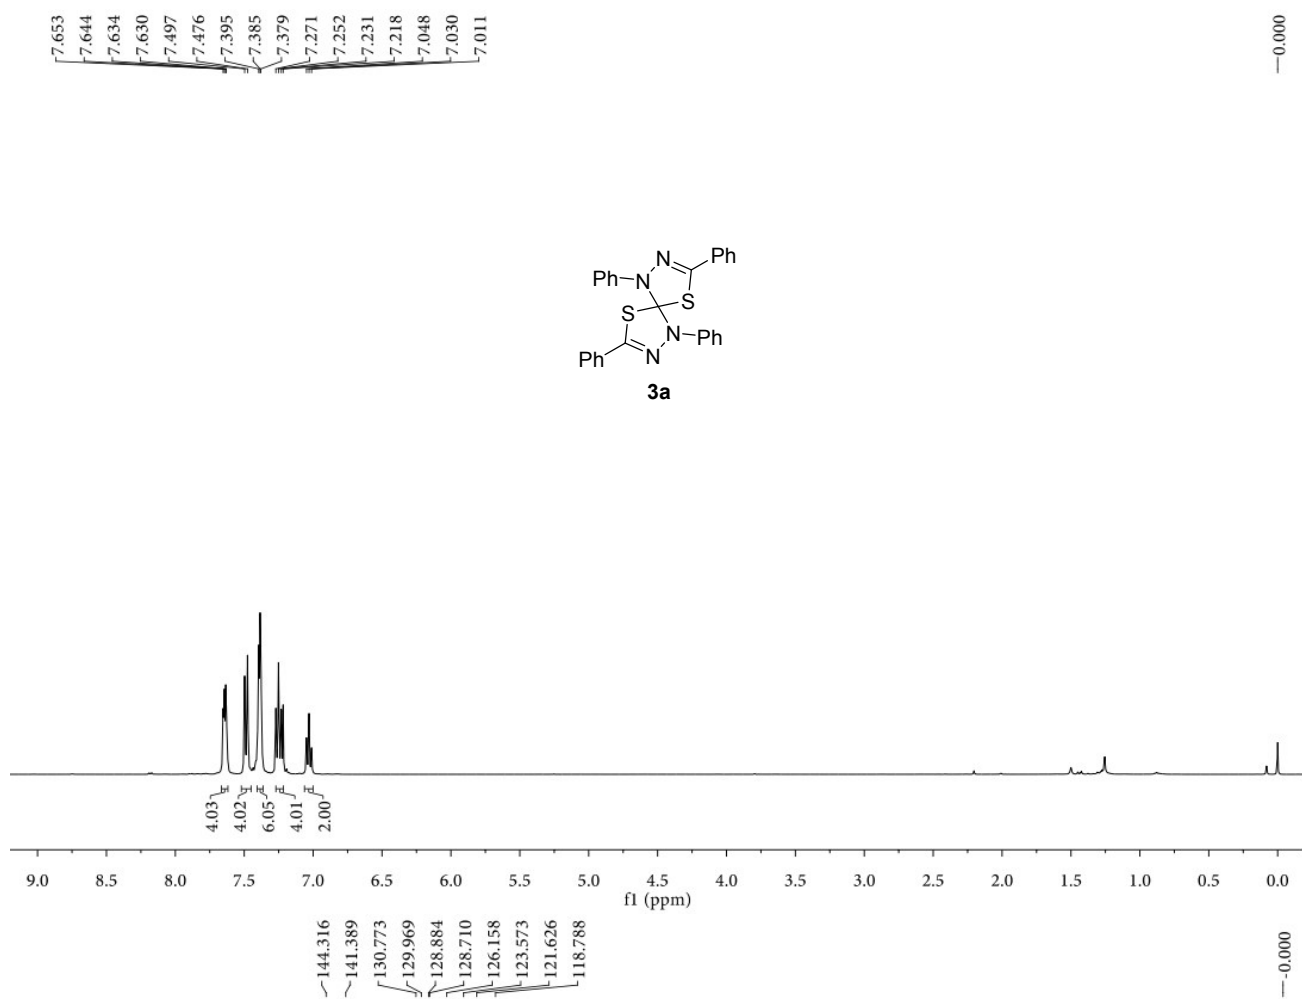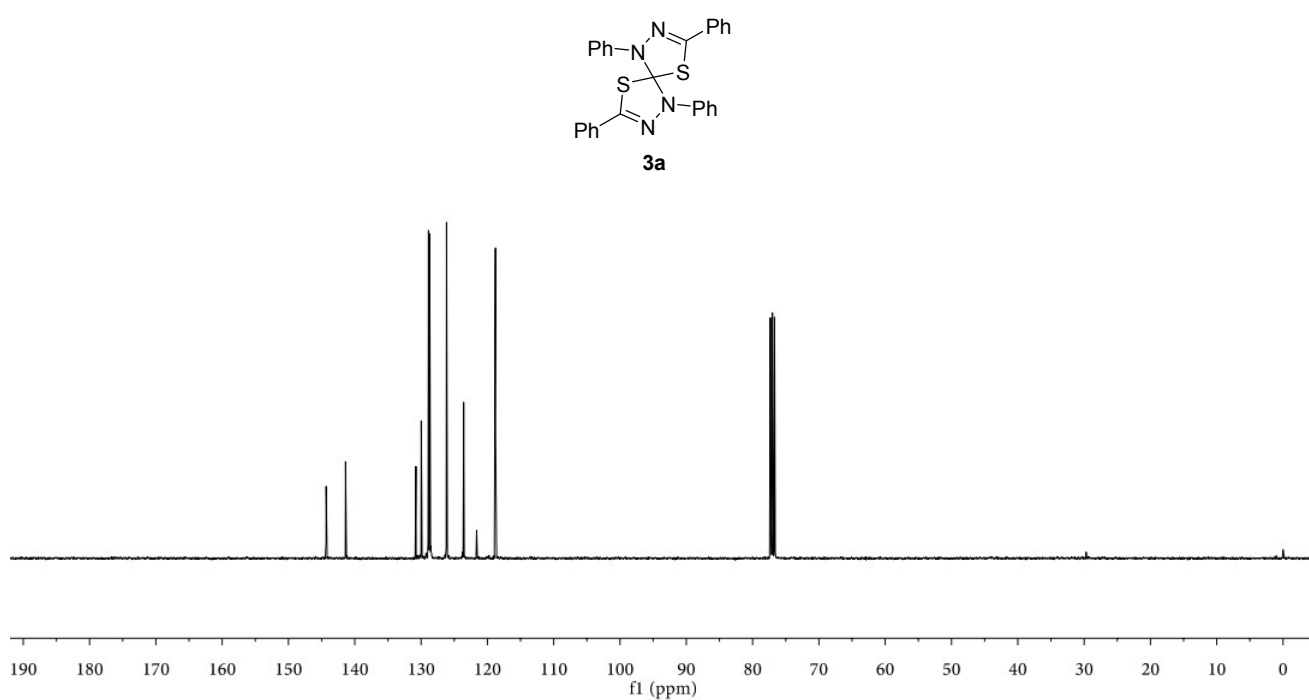

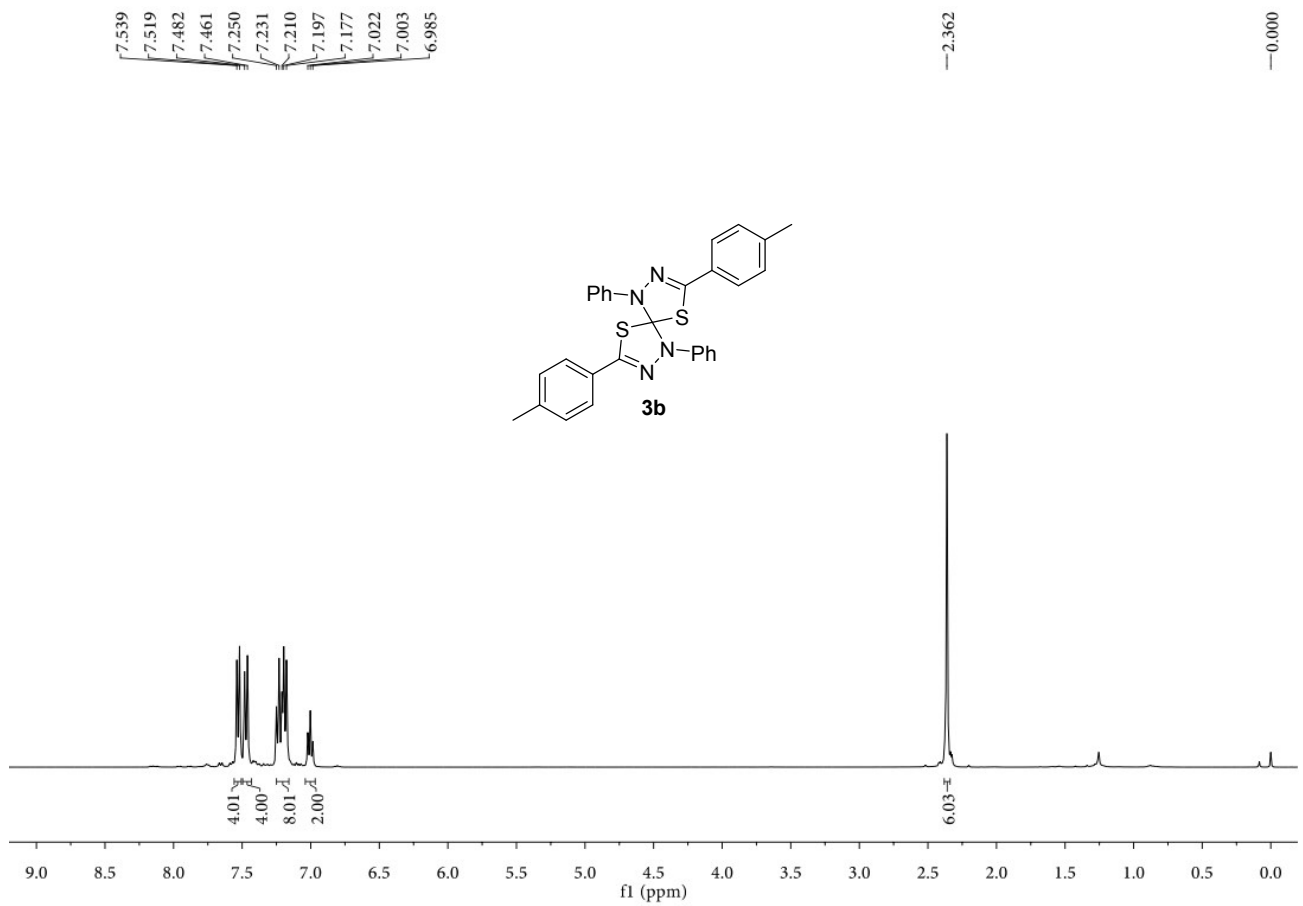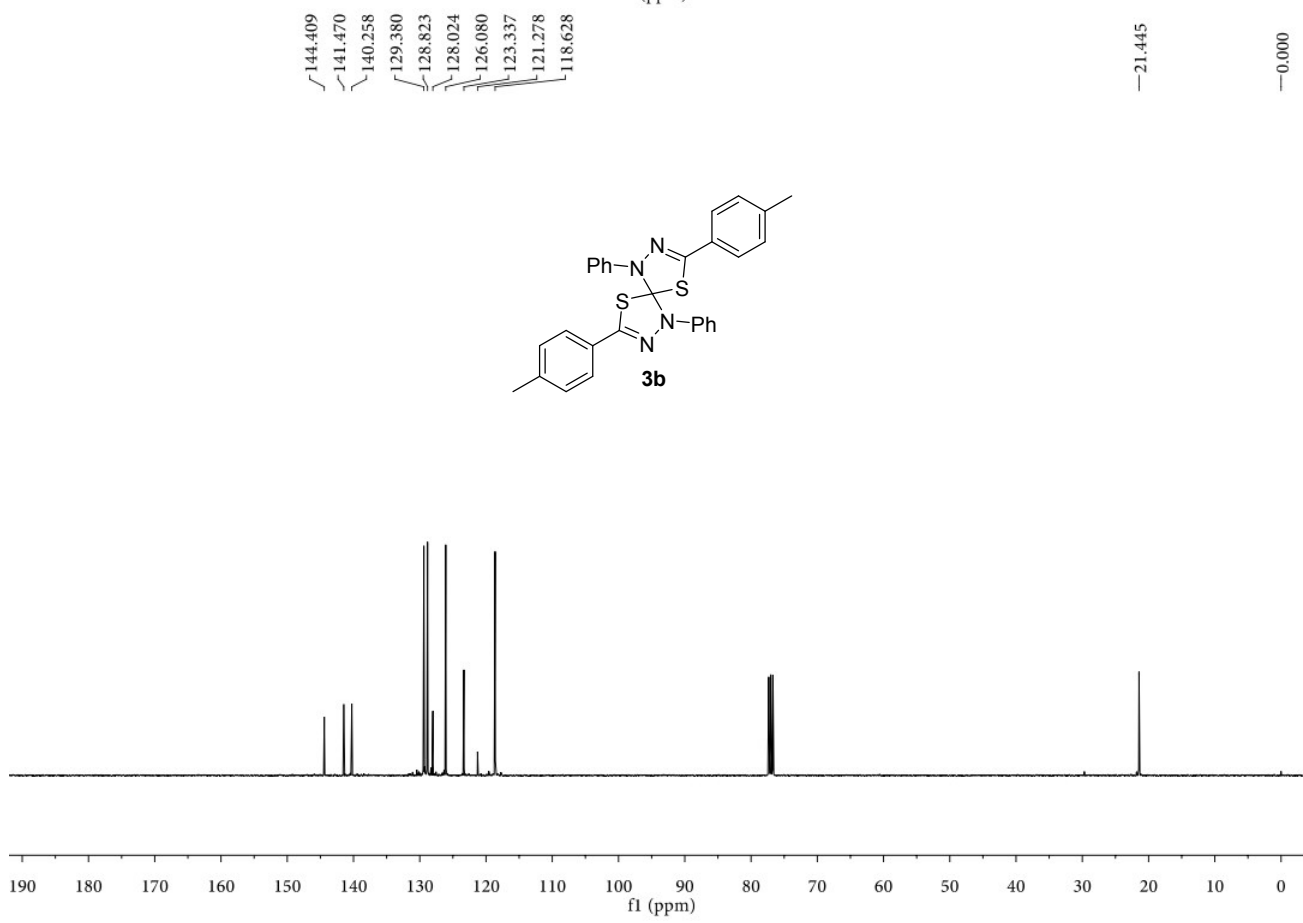



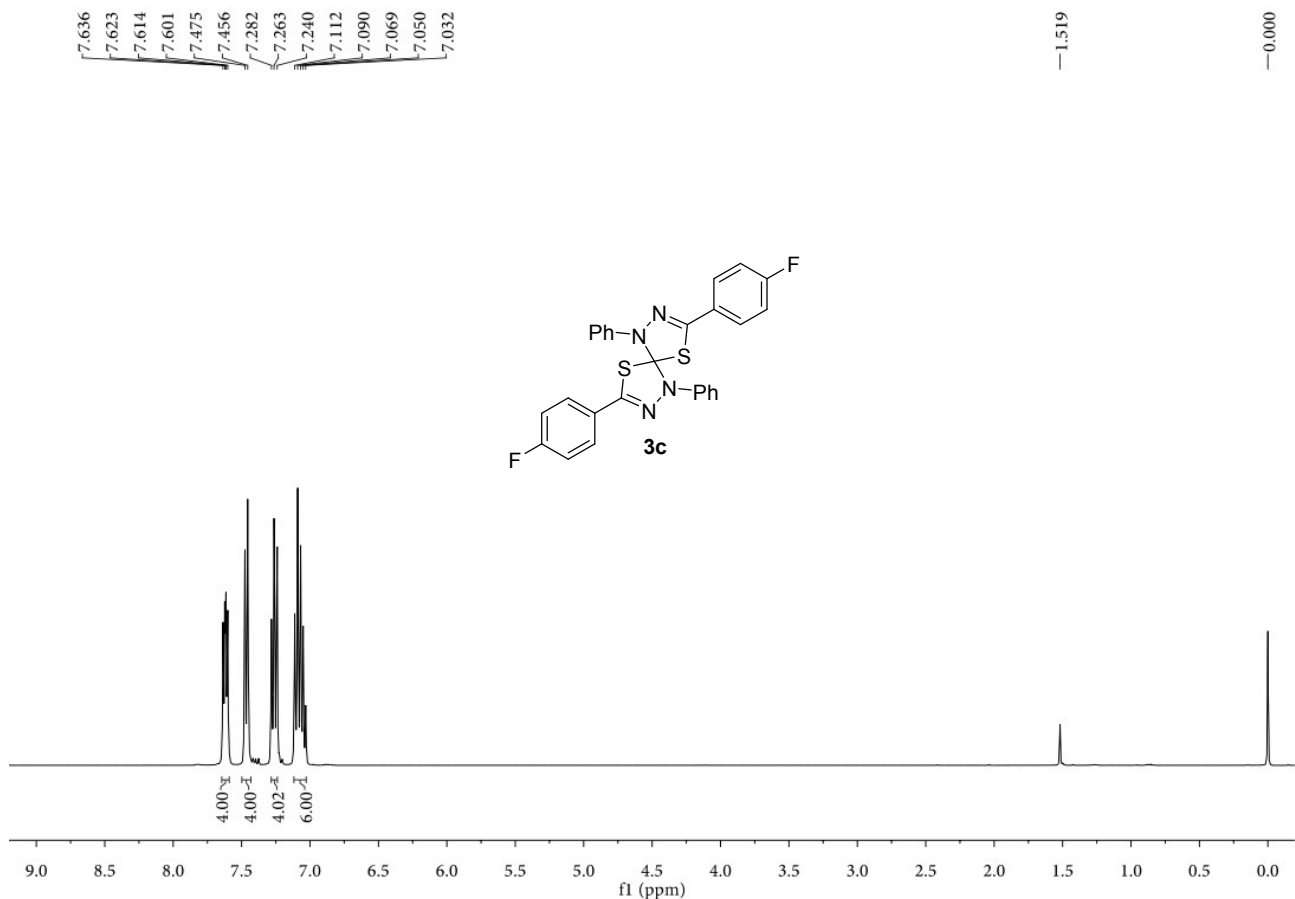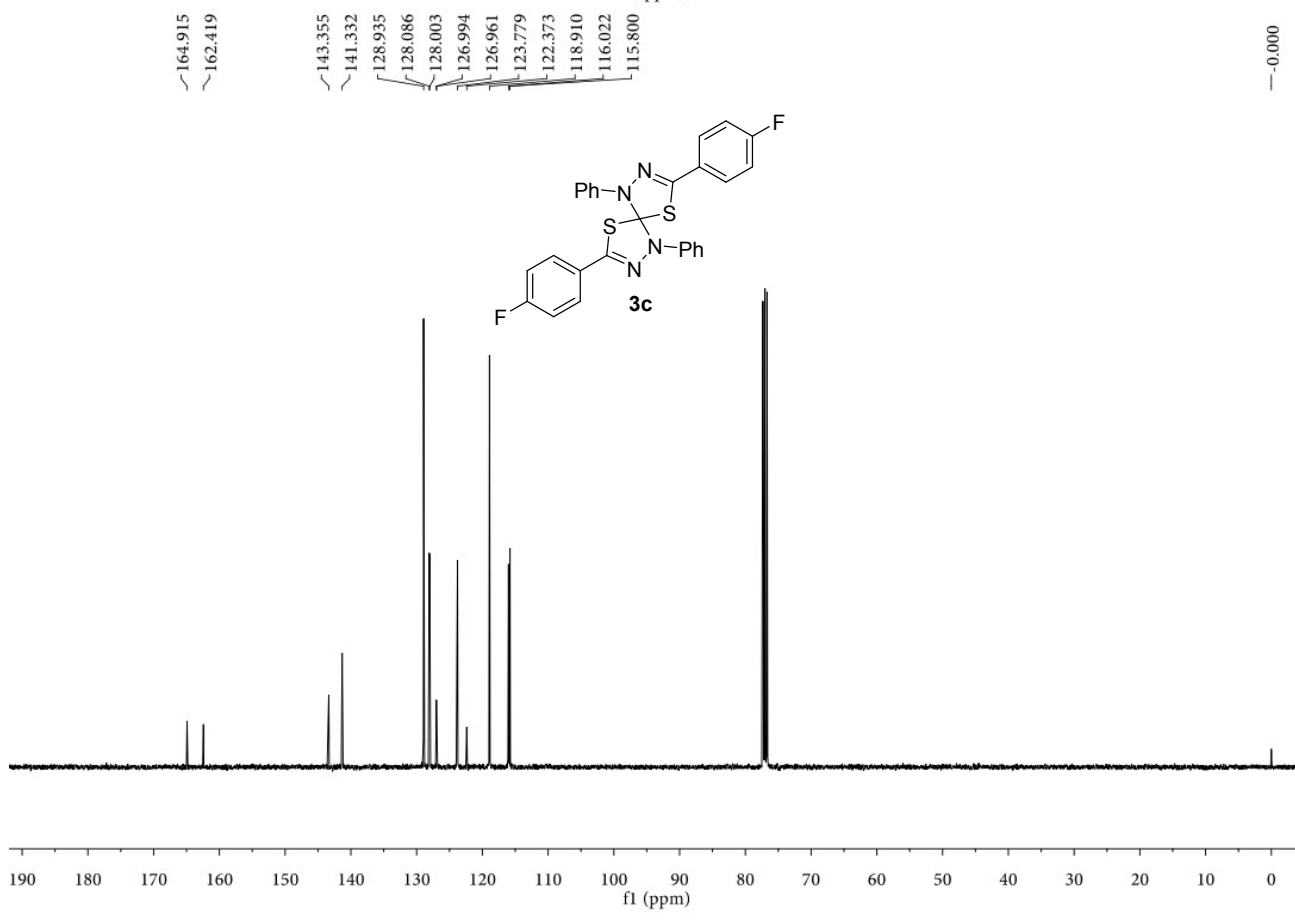

<sup>19</sup>F-NMR

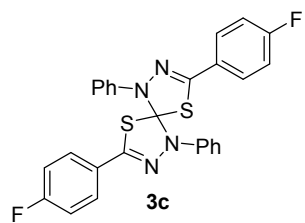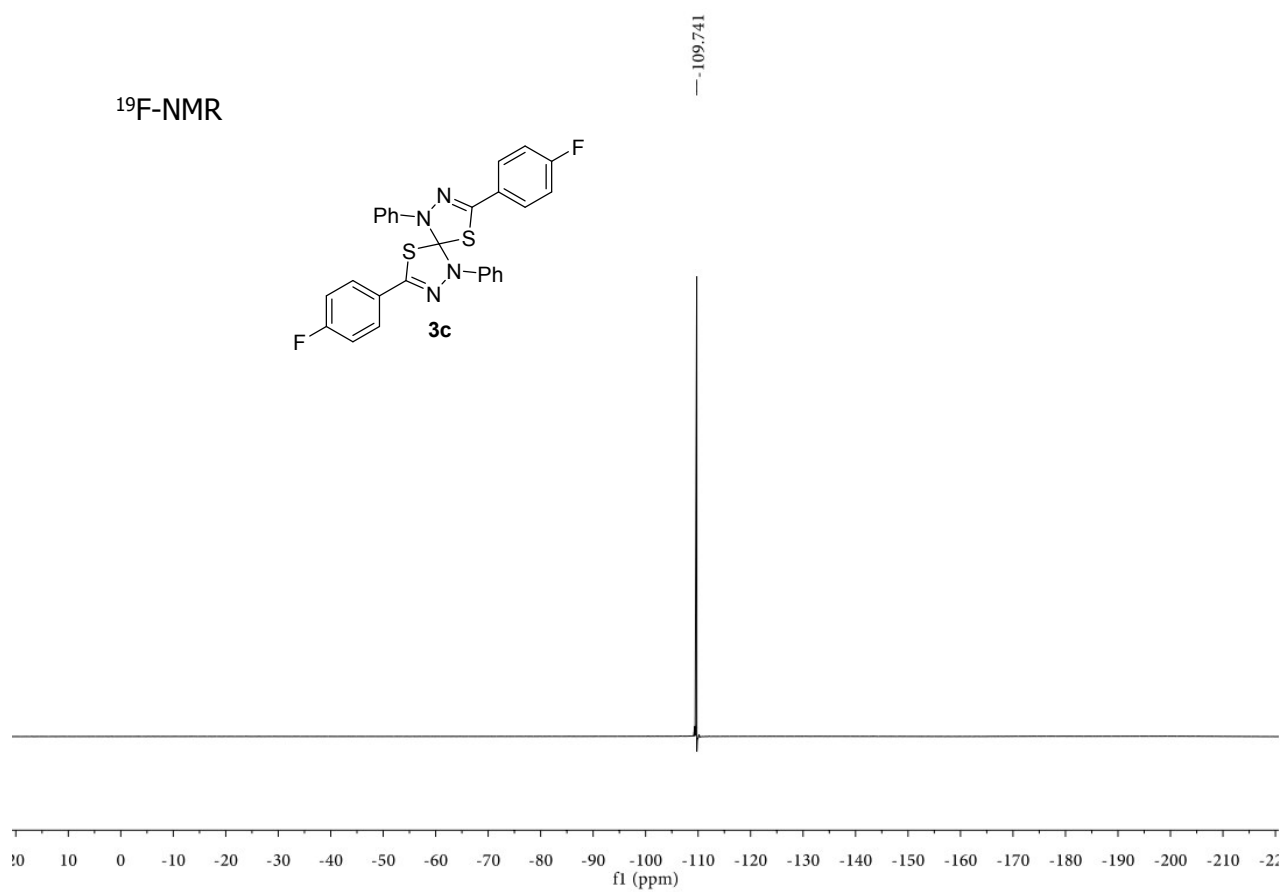

7.564  
7.543  
7.461  
7.441  
7.373  
7.352  
7.280  
7.260  
7.239  
7.074  
7.056  
7.037

1.519

0.000

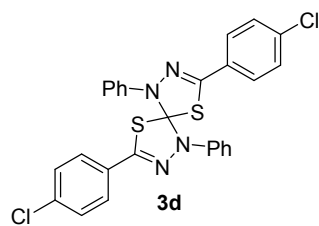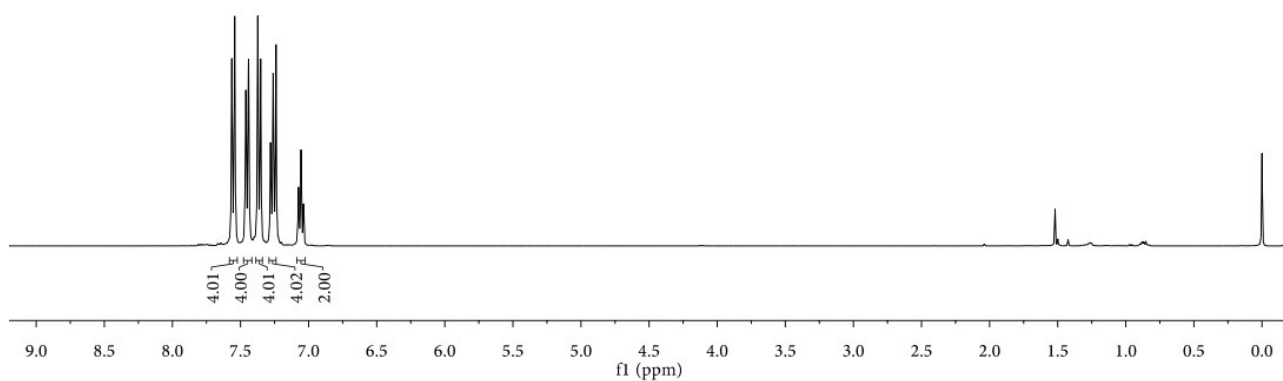

143.214  
141.183  
135.860  
129.201  
128.982  
128.959  
127.303  
123.942  
122.242  
118.983

0.000

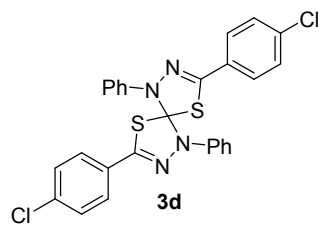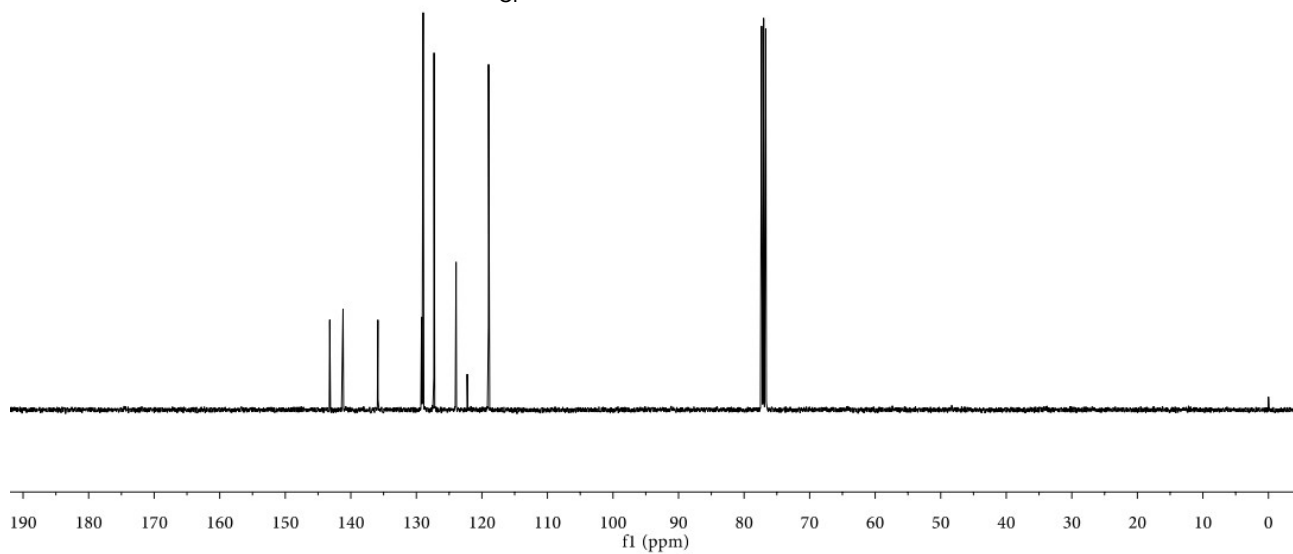

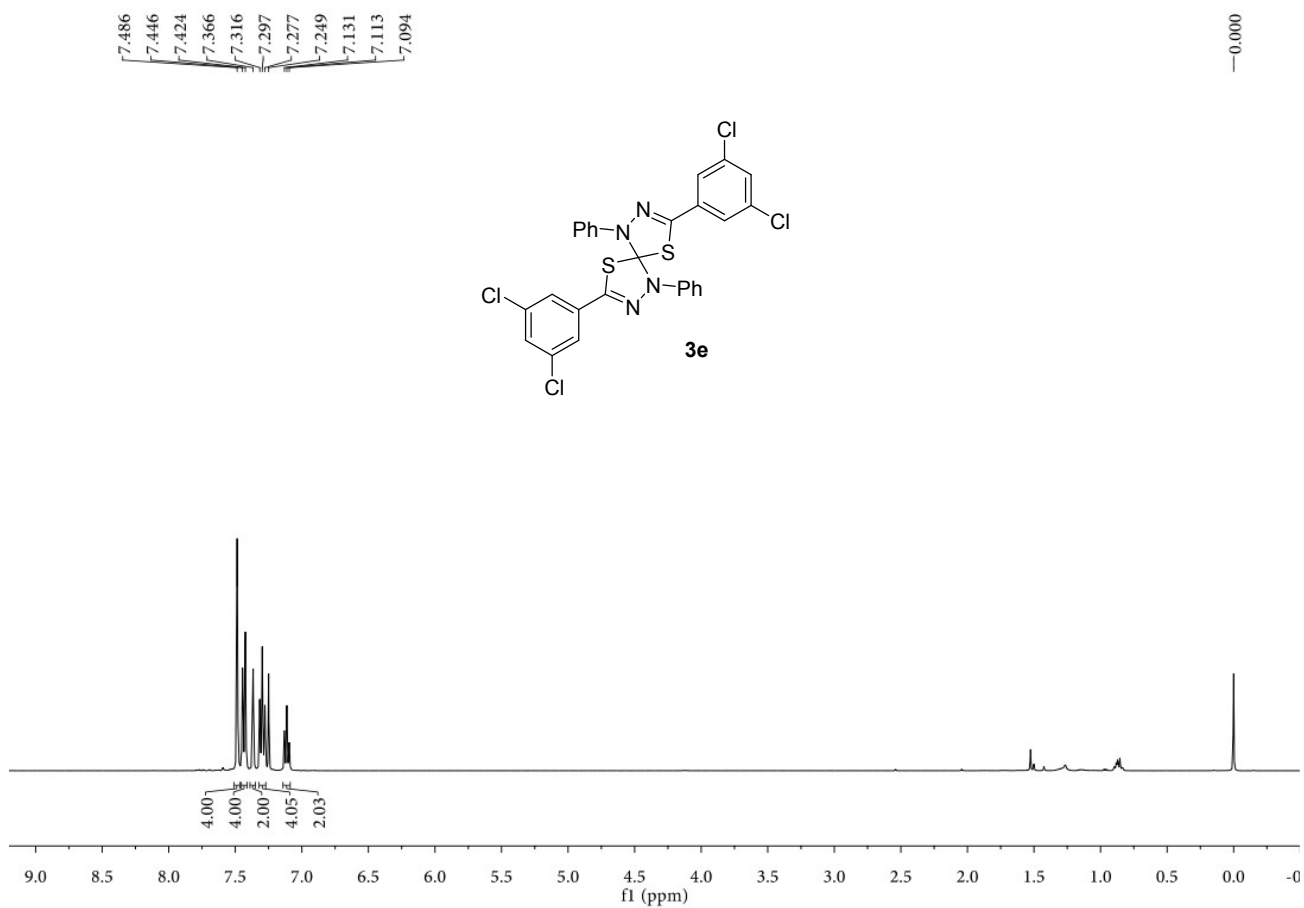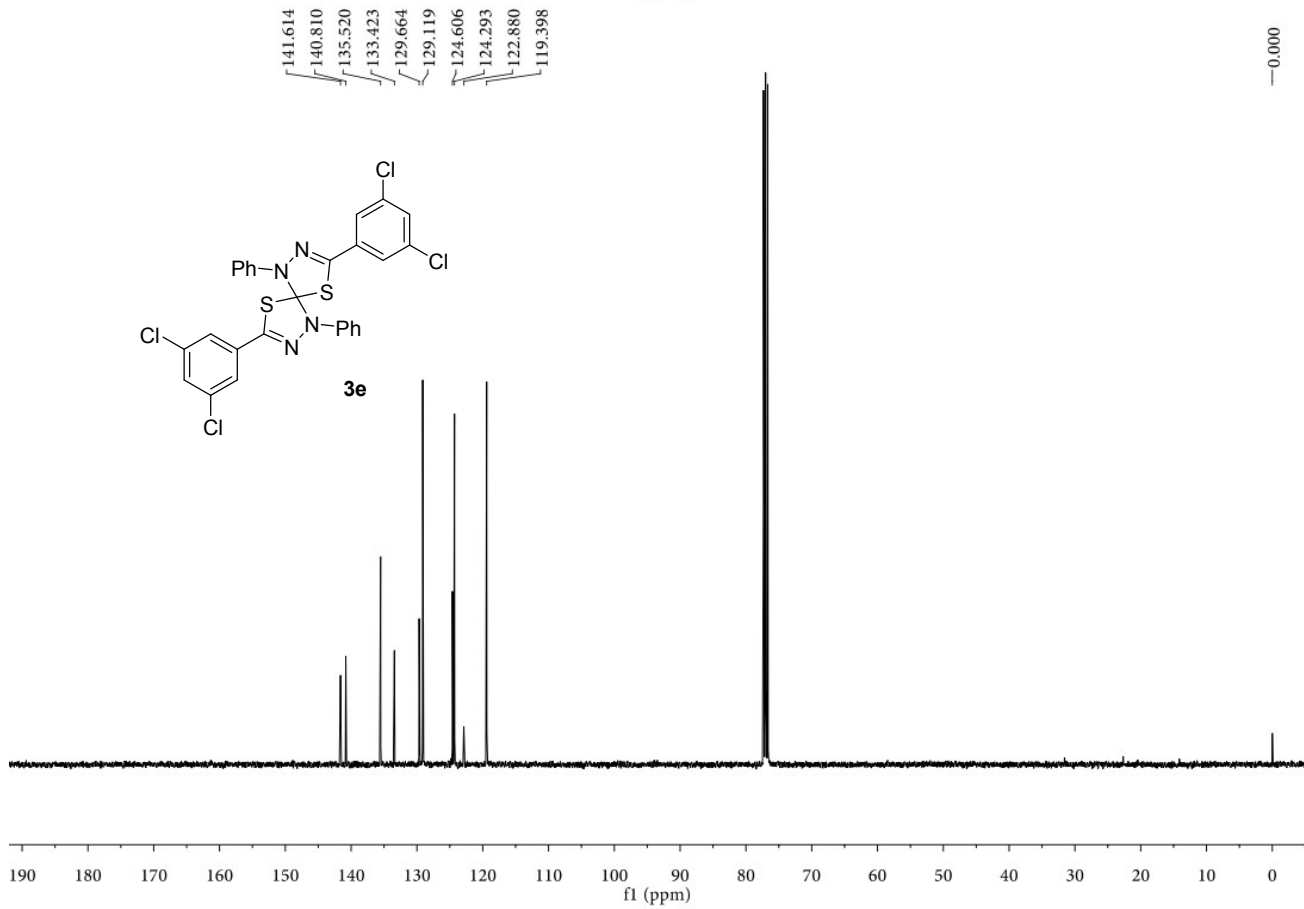

7.676  
7.672  
7.656  
7.637  
7.503  
7.482  
7.373  
7.354  
7.336  
7.301  
7.282  
7.262  
7.242  
7.225  
7.221  
7.081  
7.062  
7.044

-1.520

-0.000

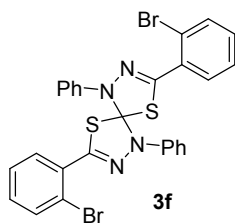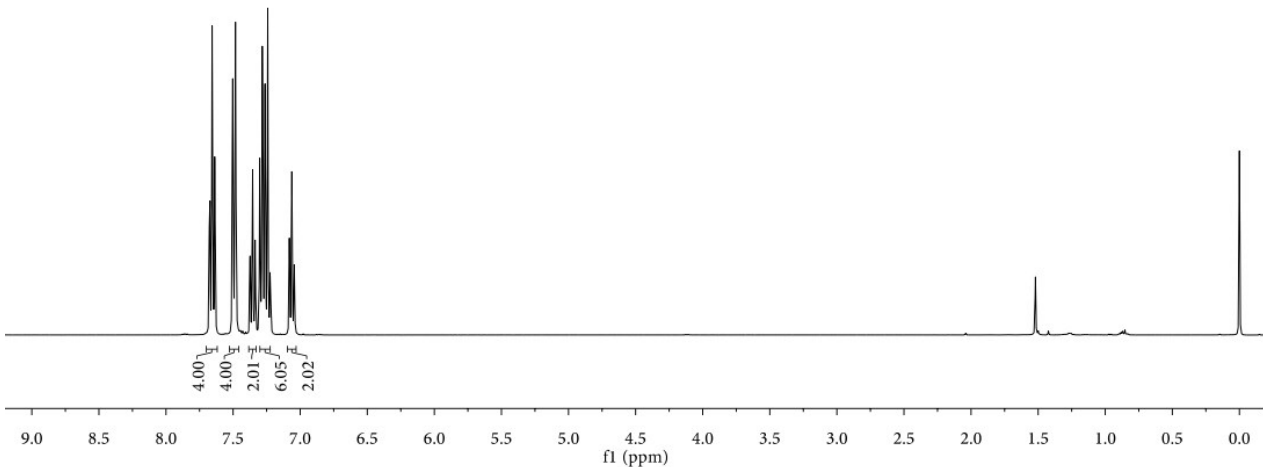

142.329  
141.130  
134.157  
131.356  
130.845  
130.833  
128.897  
127.481  
123.747  
121.541  
121.265  
118.959

-0.000

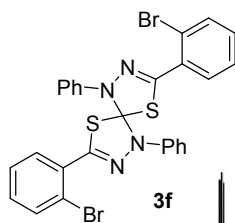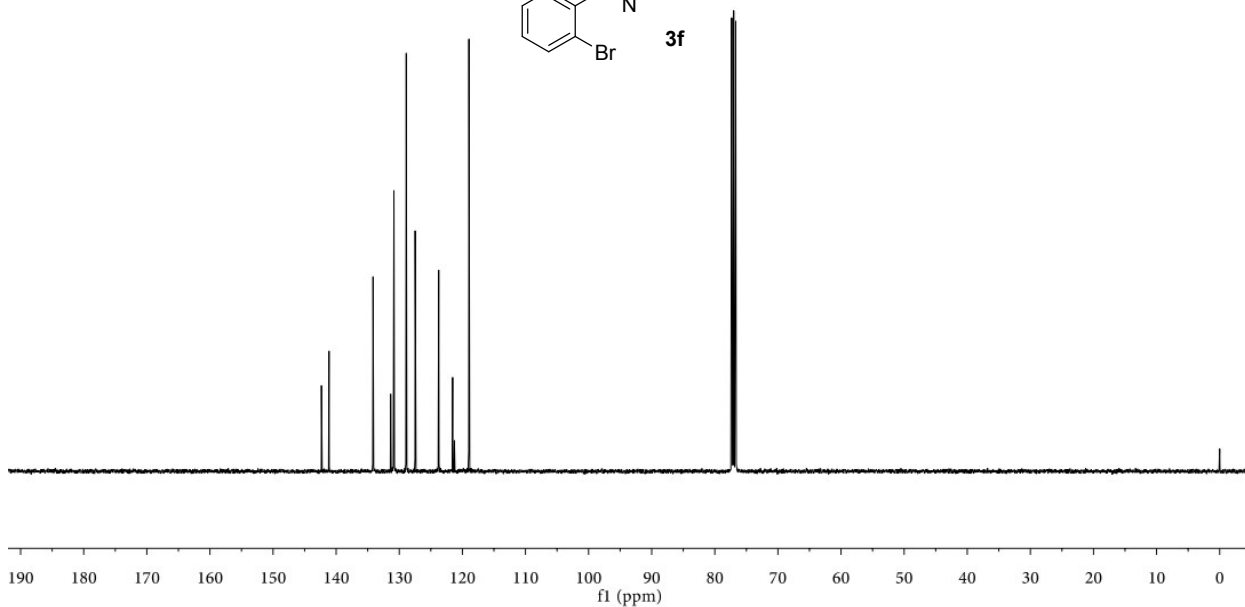

7.829  
7.497  
7.473  
7.464  
7.443  
7.287  
7.268  
7.247  
7.226  
7.220  
7.207  
7.081  
7.063  
7.045

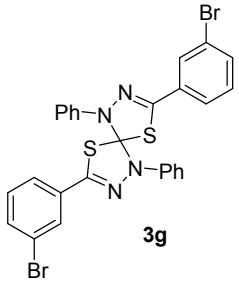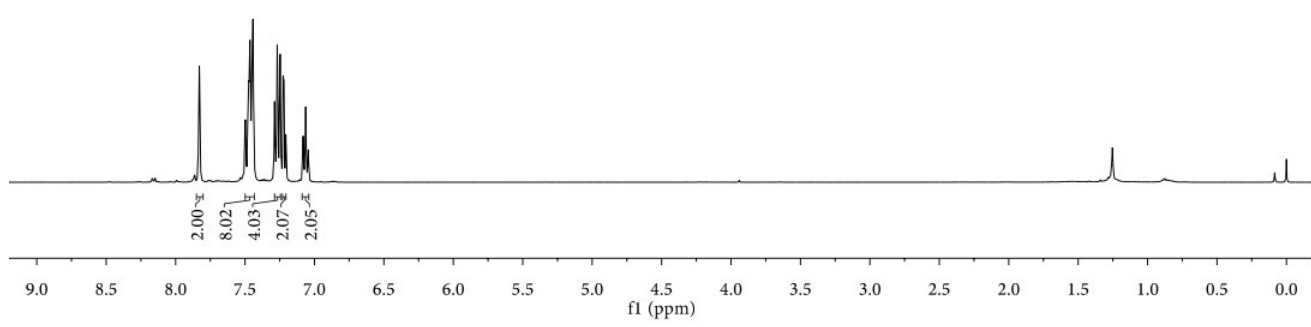

142.812  
141.142  
132.897  
132.680  
130.287  
129.082  
128.805  
124.873  
124.186  
122.981  
122.316  
119.159

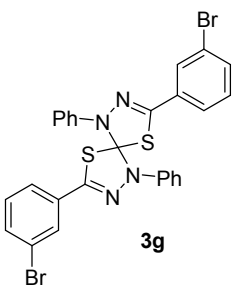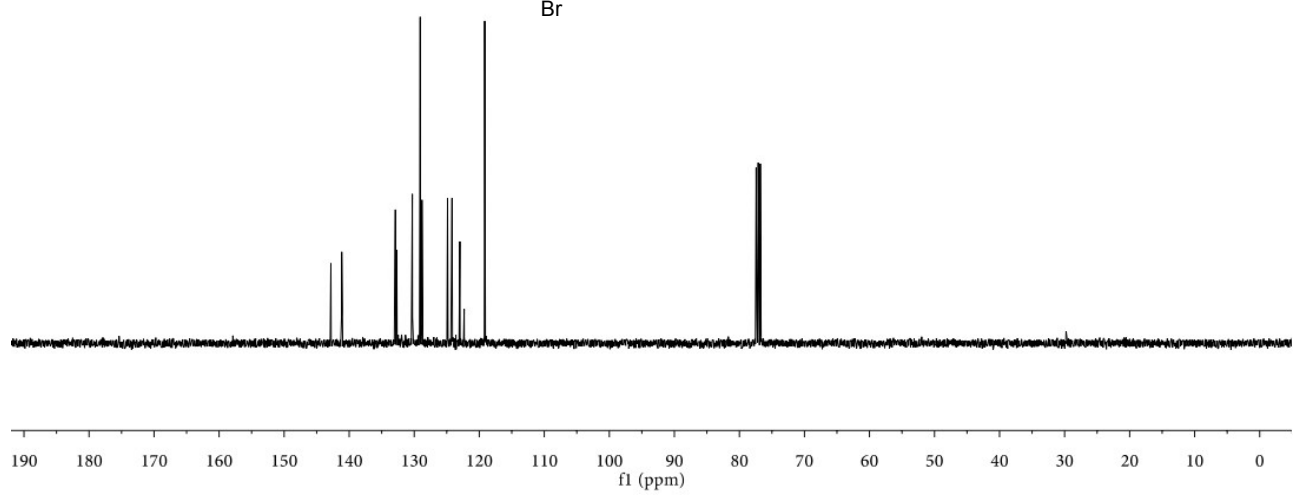

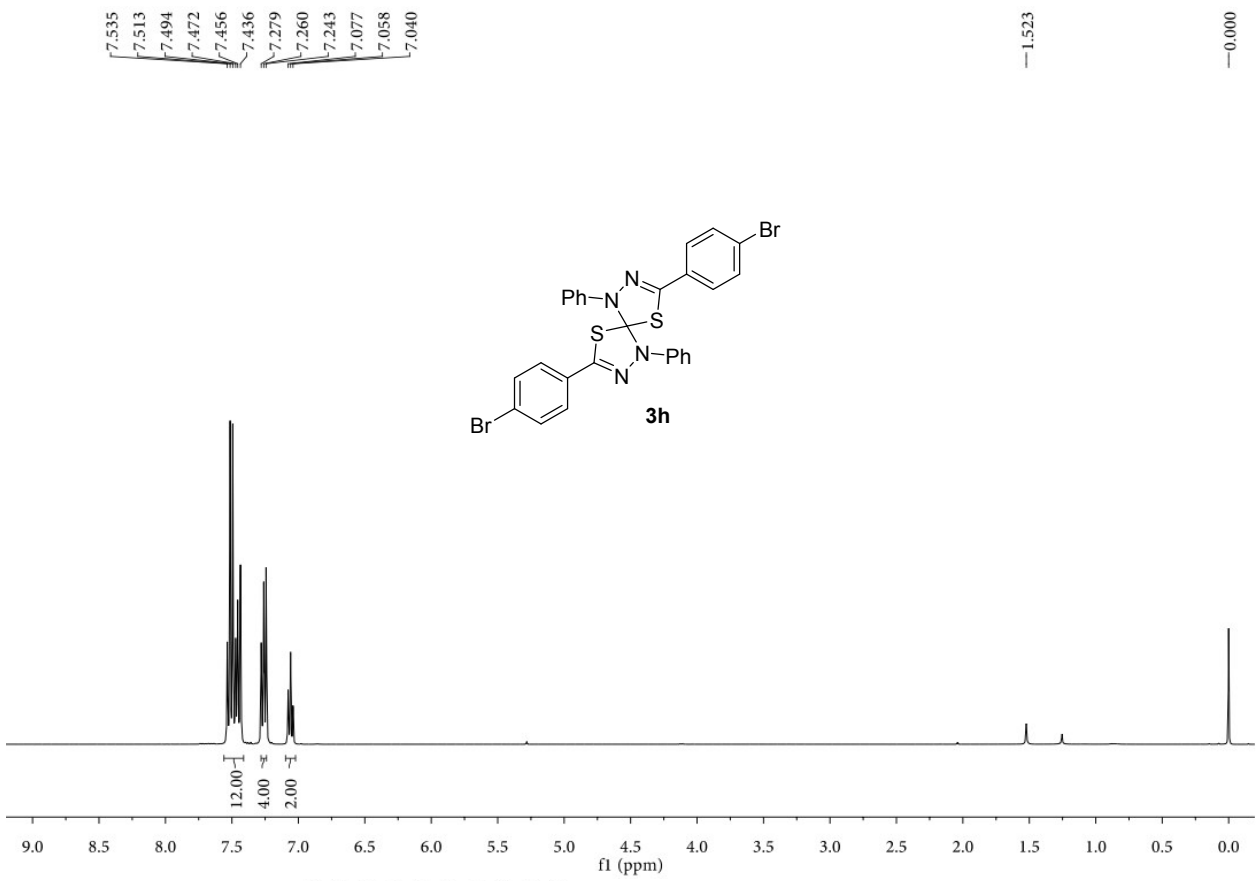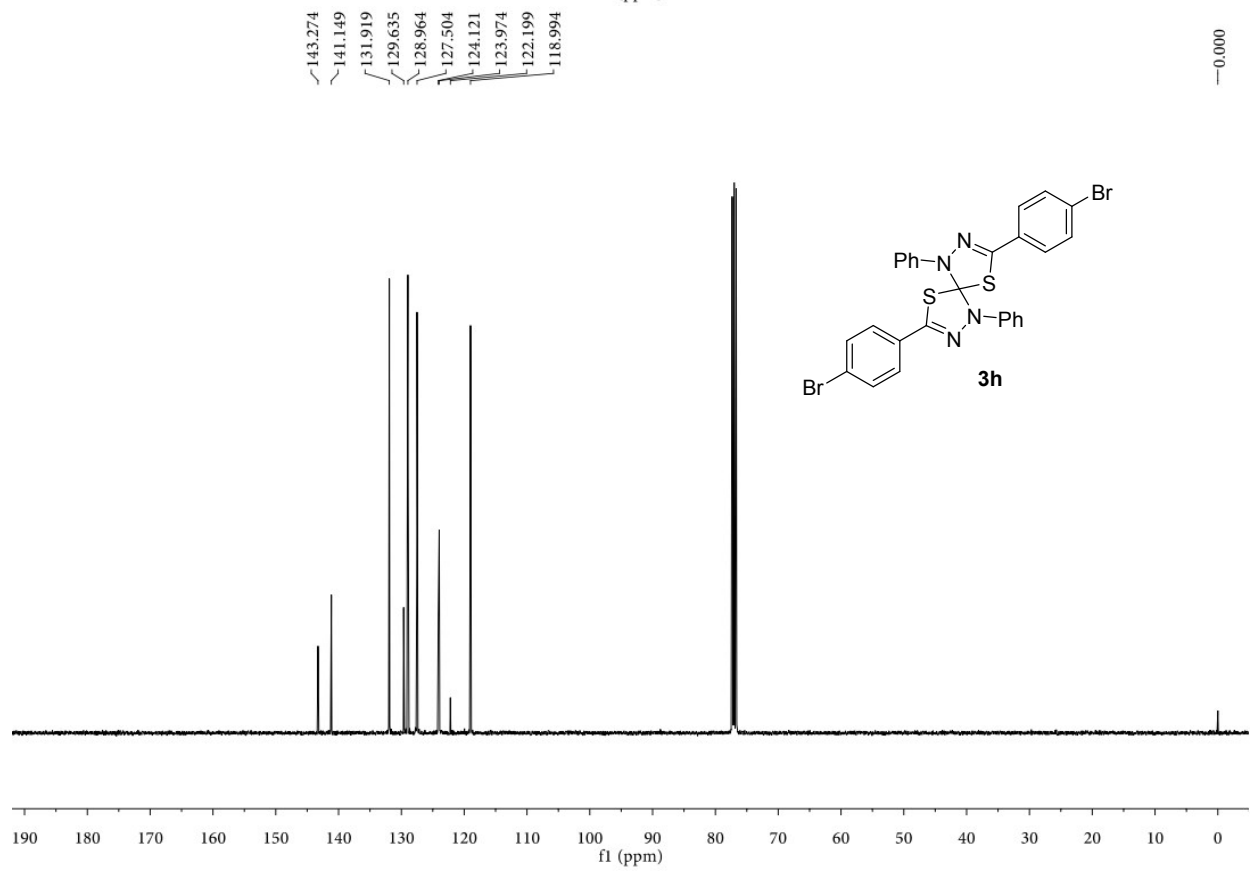

7.741  
7.721  
7.663  
7.642  
7.481  
7.461  
7.304  
7.286  
7.264  
7.244  
7.111  
7.093  
7.074

—1.522

—0.000

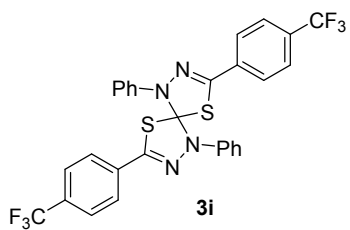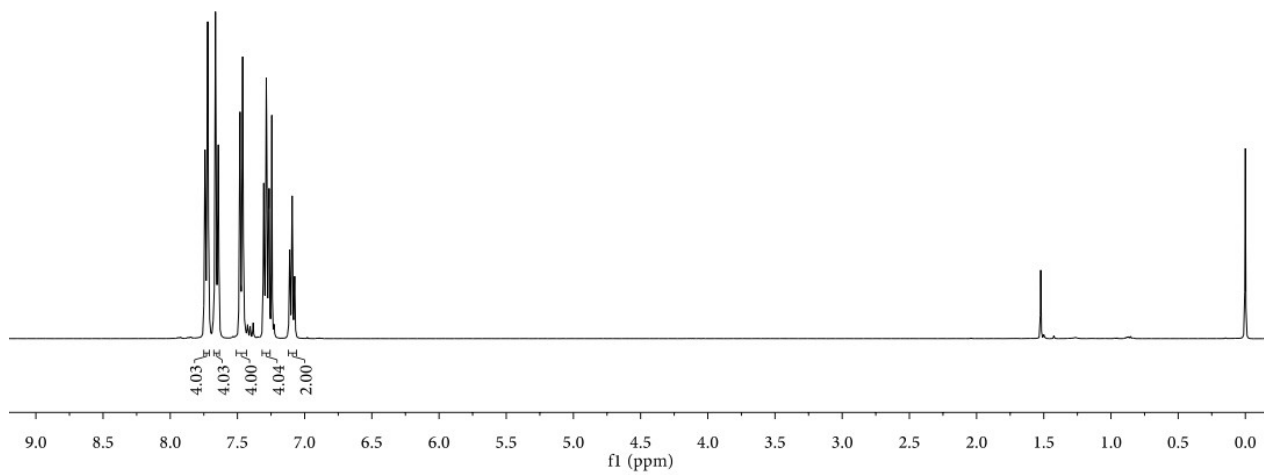

142.785  
141.000  
134.023  
132.076  
131.751  
131.426  
131.101  
129.077  
126.334  
125.779  
125.742  
125.144  
124.396  
122.479  
122.440  
120.237  
119.282

—0.000

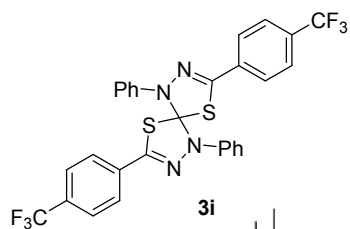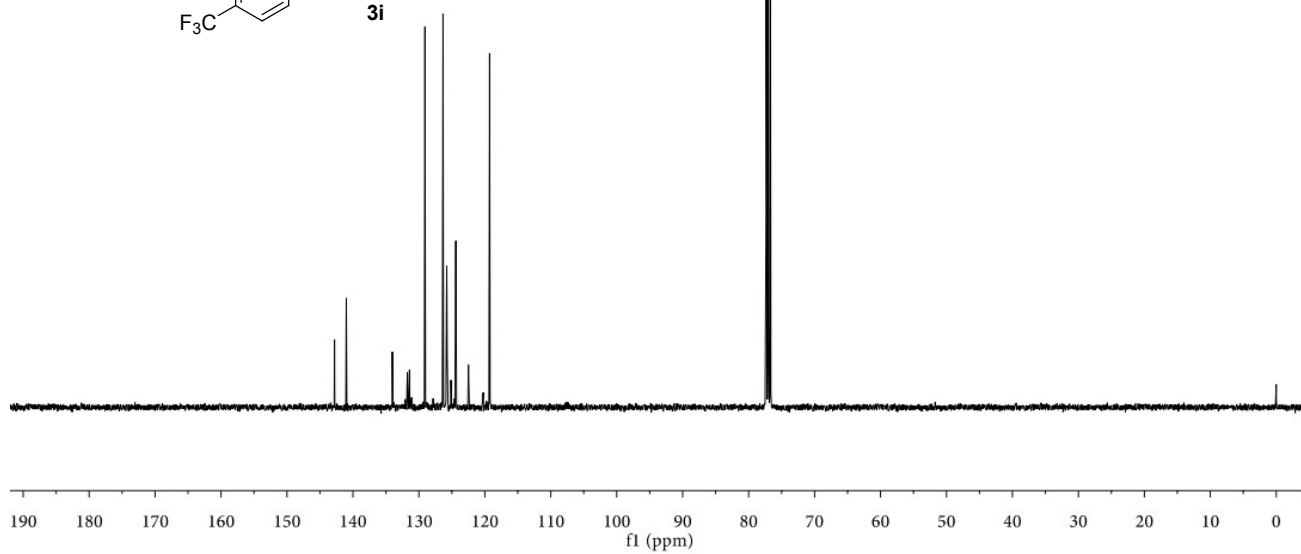



<sup>19</sup>F-NMR

-62.762

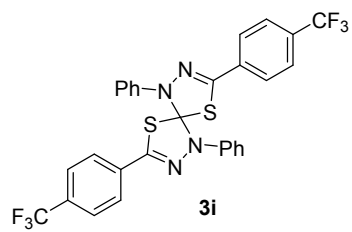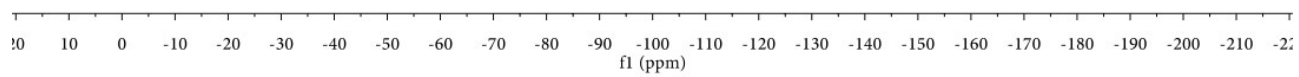

7.476  
7.466  
7.446  
7.280  
7.261  
7.243  
7.073  
7.055  
7.036  
6.702  
6.694  
6.487  
6.484  
6.480  
6.475

-0.000

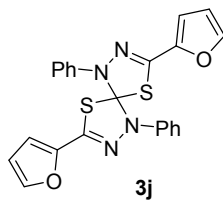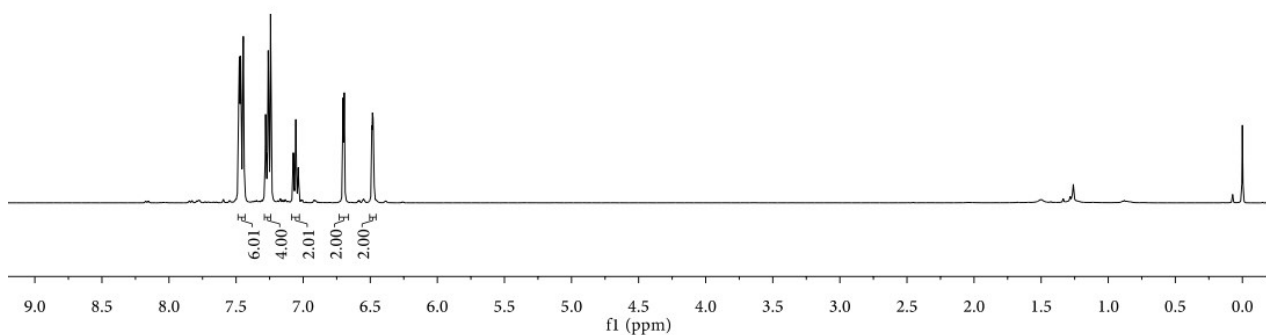

145.207  
143.888  
141.312  
135.822  
128.950  
124.033  
119.457  
111.949  
110.324

-0.000

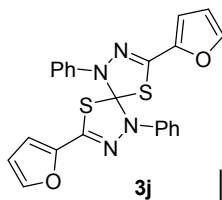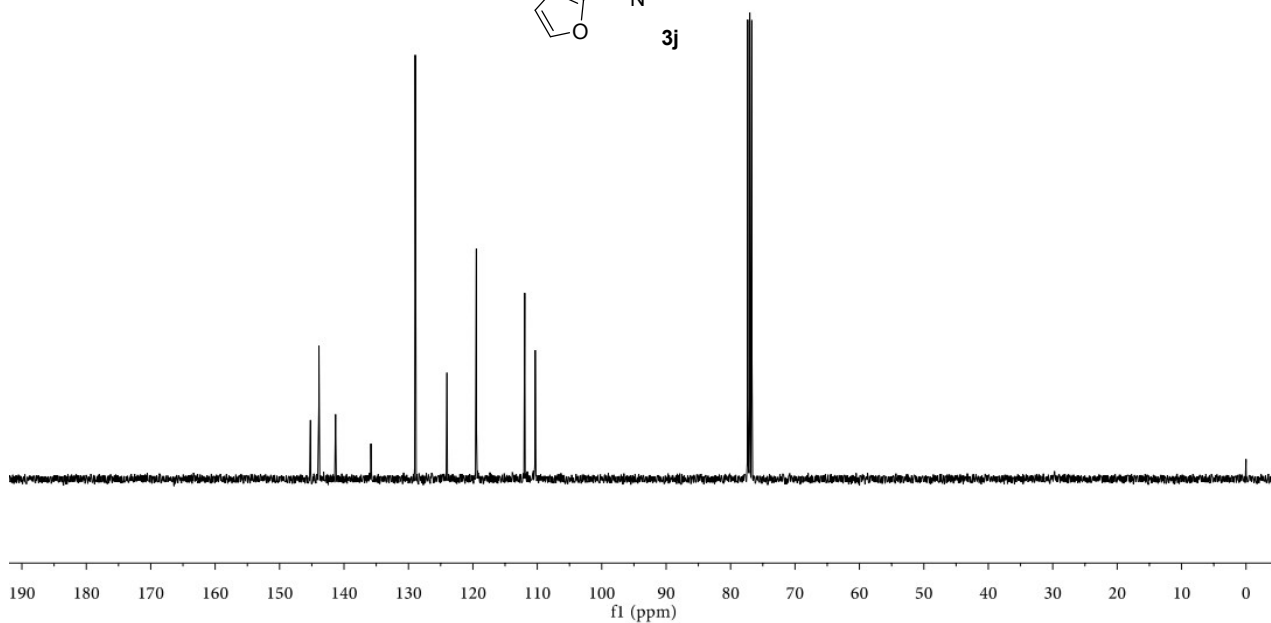

7.503  
7.501  
7.491  
7.488  
7.474  
7.454  
7.380  
7.376  
7.373  
7.363  
7.356  
7.351  
7.344  
7.278  
7.259  
7.238  
7.058  
7.040  
7.022

1.523

0.000

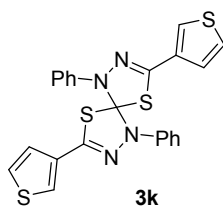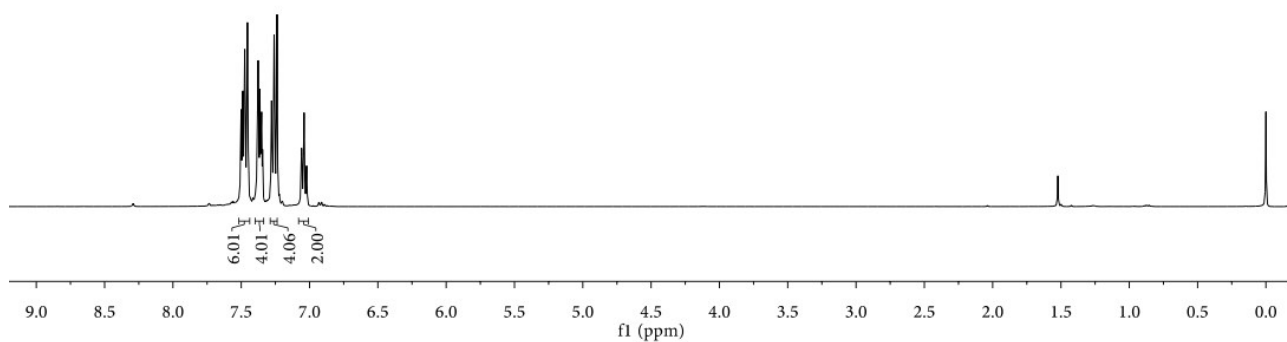

141.386  
140.237  
132.566  
128.889  
126.661  
125.208  
124.486  
123.604  
121.819  
118.932

0.000

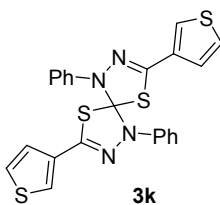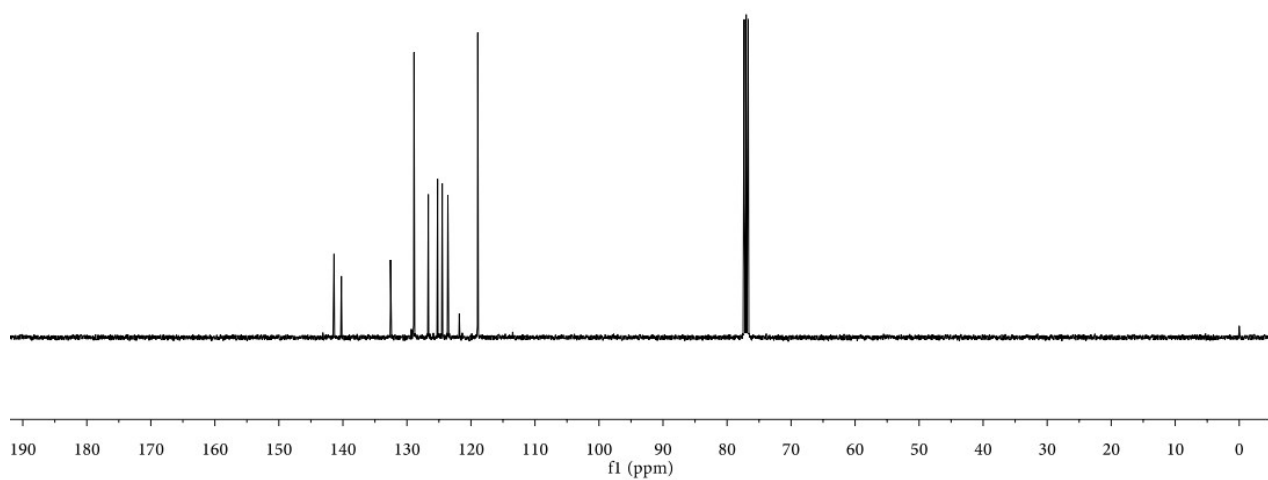

8.016  
8.012  
7.994  
7.991  
7.876  
7.845  
7.827  
7.812  
7.803  
7.565  
7.545  
7.525  
7.509  
7.500  
7.490  
7.474  
7.294  
7.275  
7.254  
7.229  
7.063  
7.045  
7.026

-1.507

-0.000

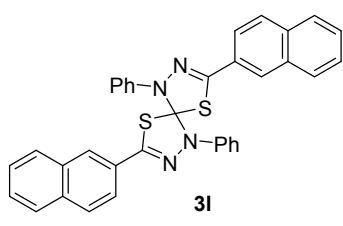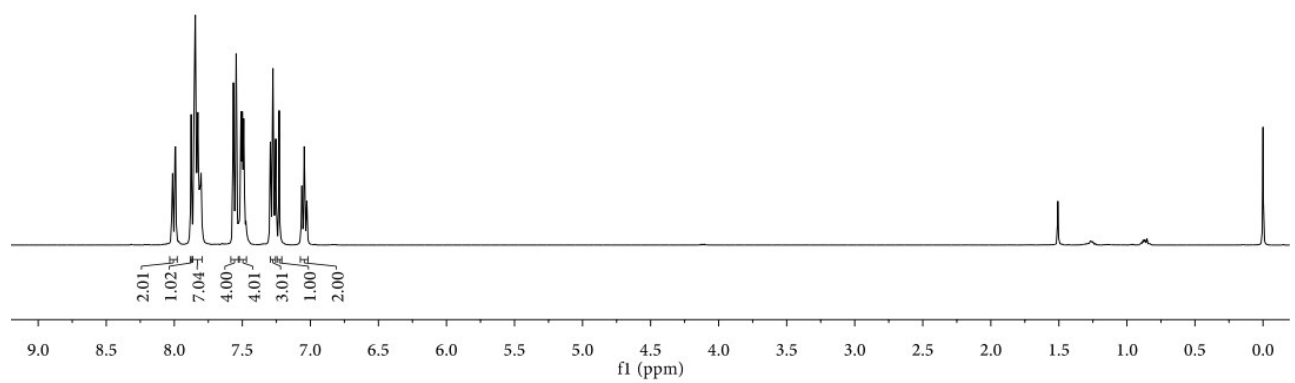

144.431  
141.386  
134.009  
133.013  
128.952  
128.455  
128.310  
128.268  
127.850  
127.094  
126.830  
126.483  
123.701  
122.839  
121.412  
118.879

-0.000

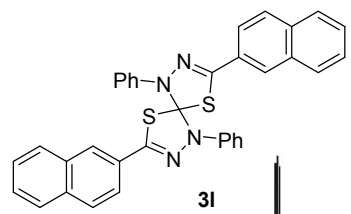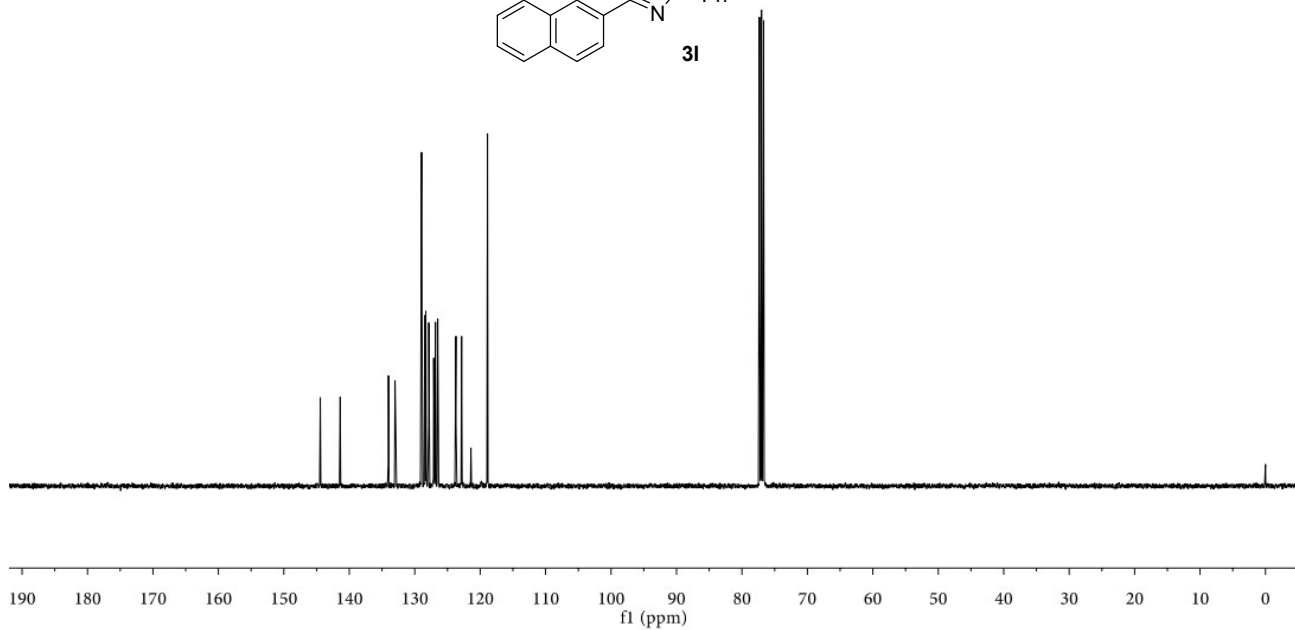

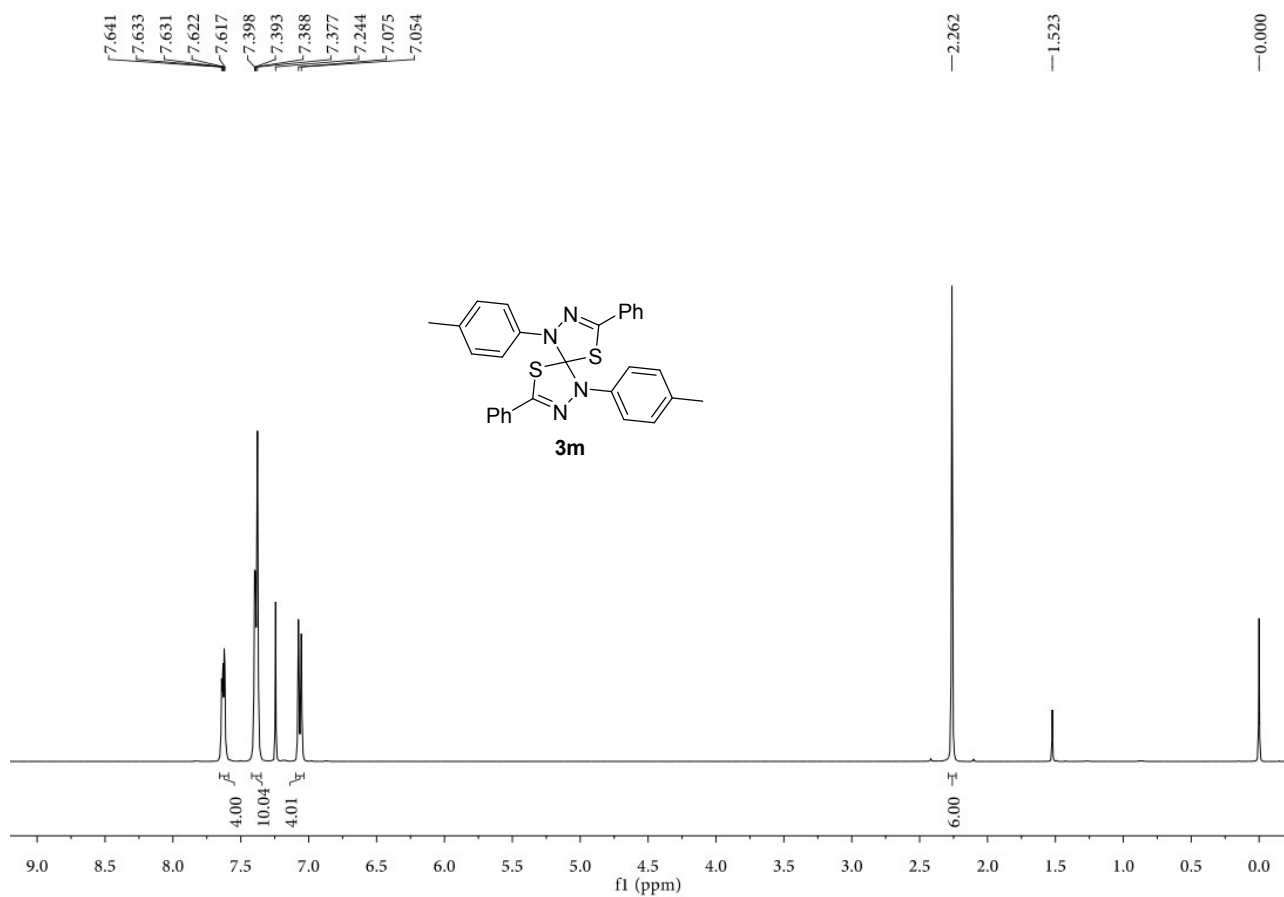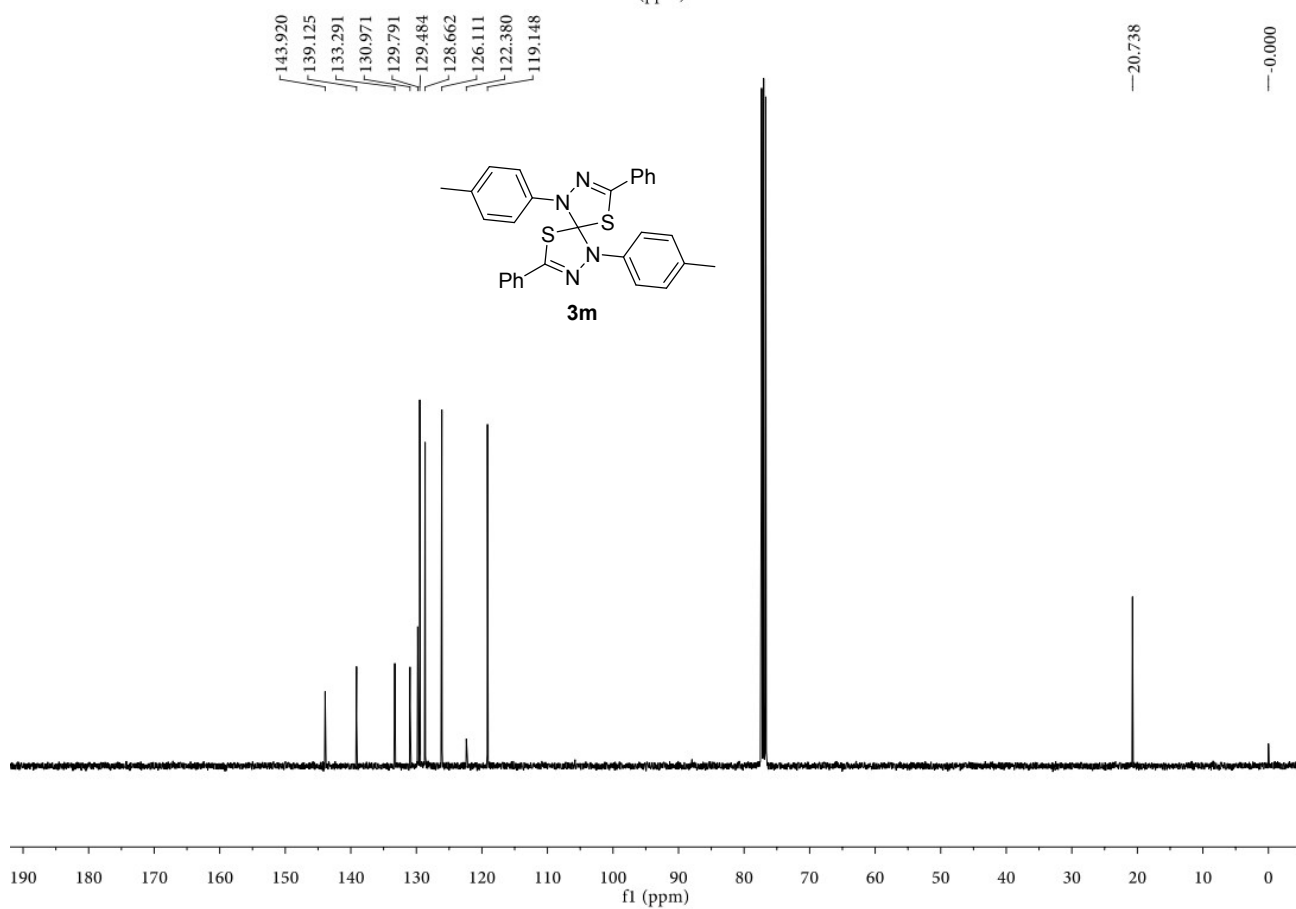

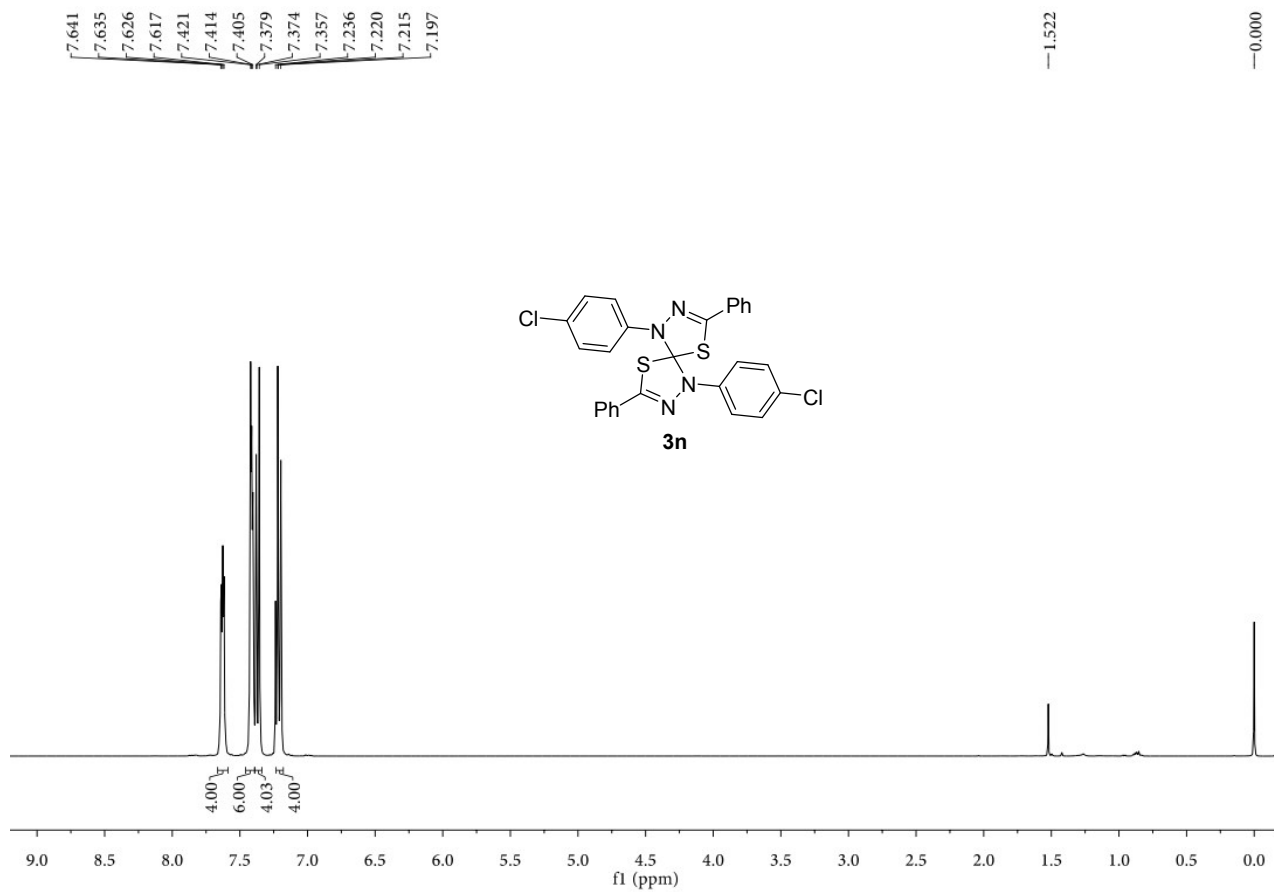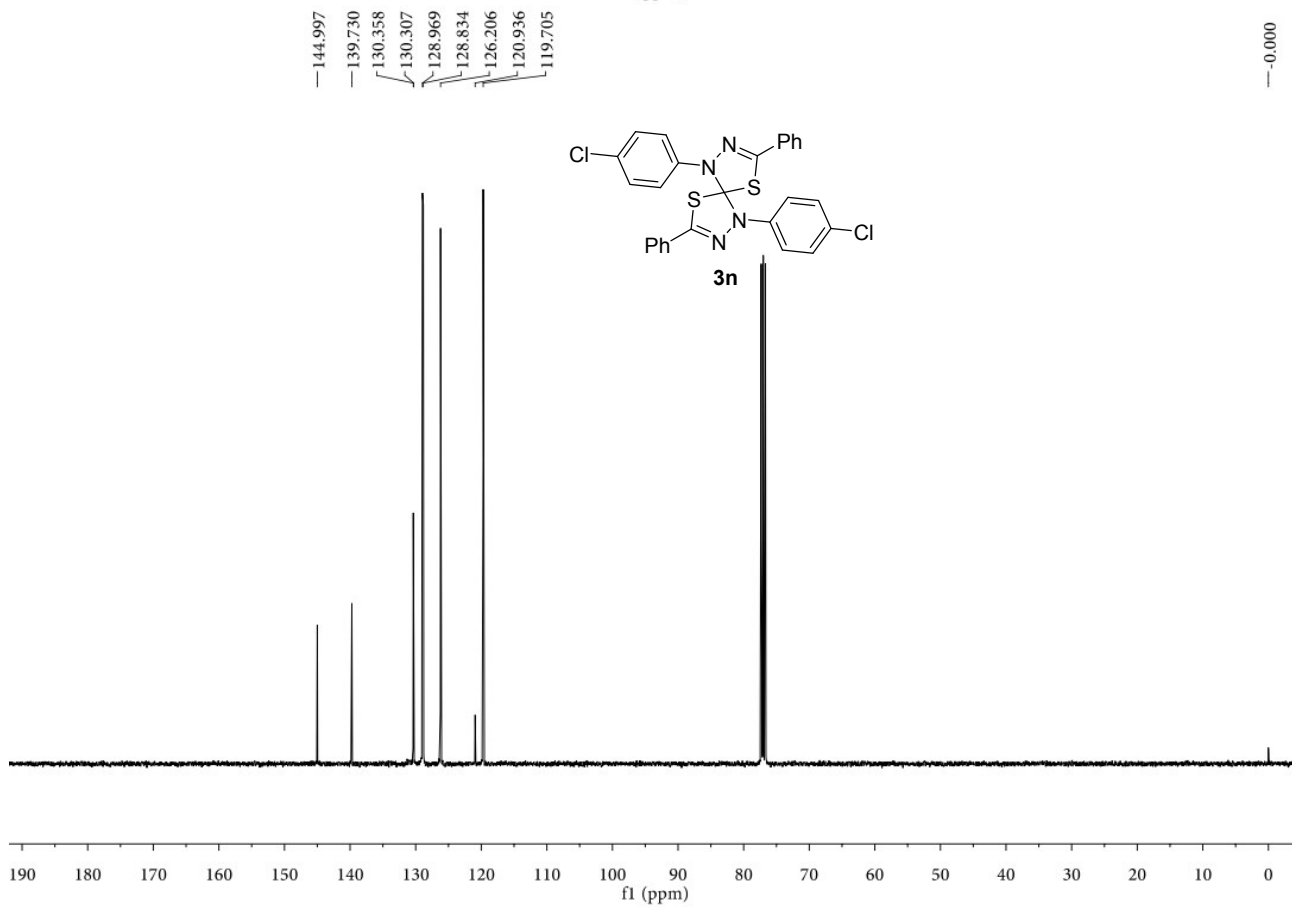

7.384  
7.364  
7.326  
7.308  
7.287  
7.252  
7.195  
7.177  
7.159

4.379  
4.361  
4.343  
4.326

1.373  
1.355  
1.338

-0.000

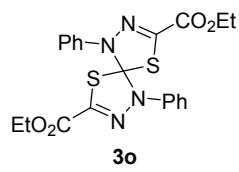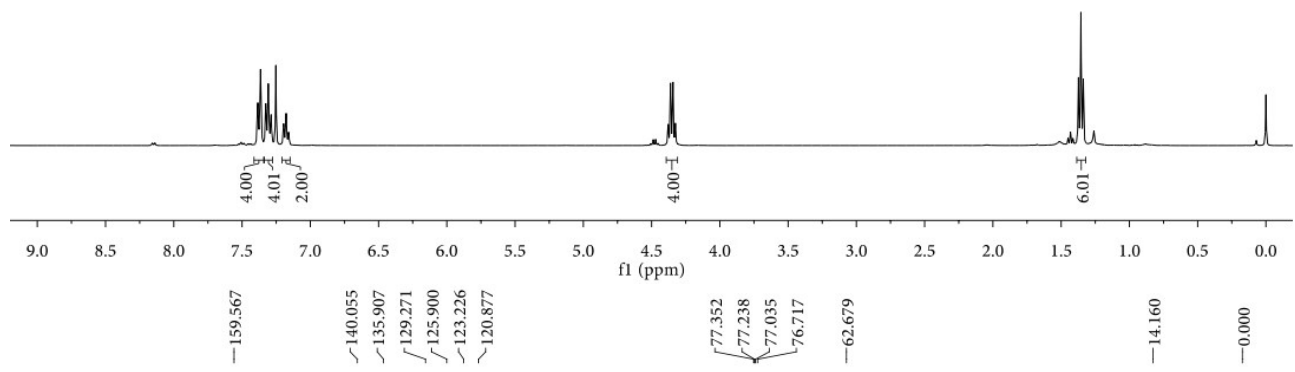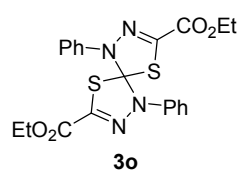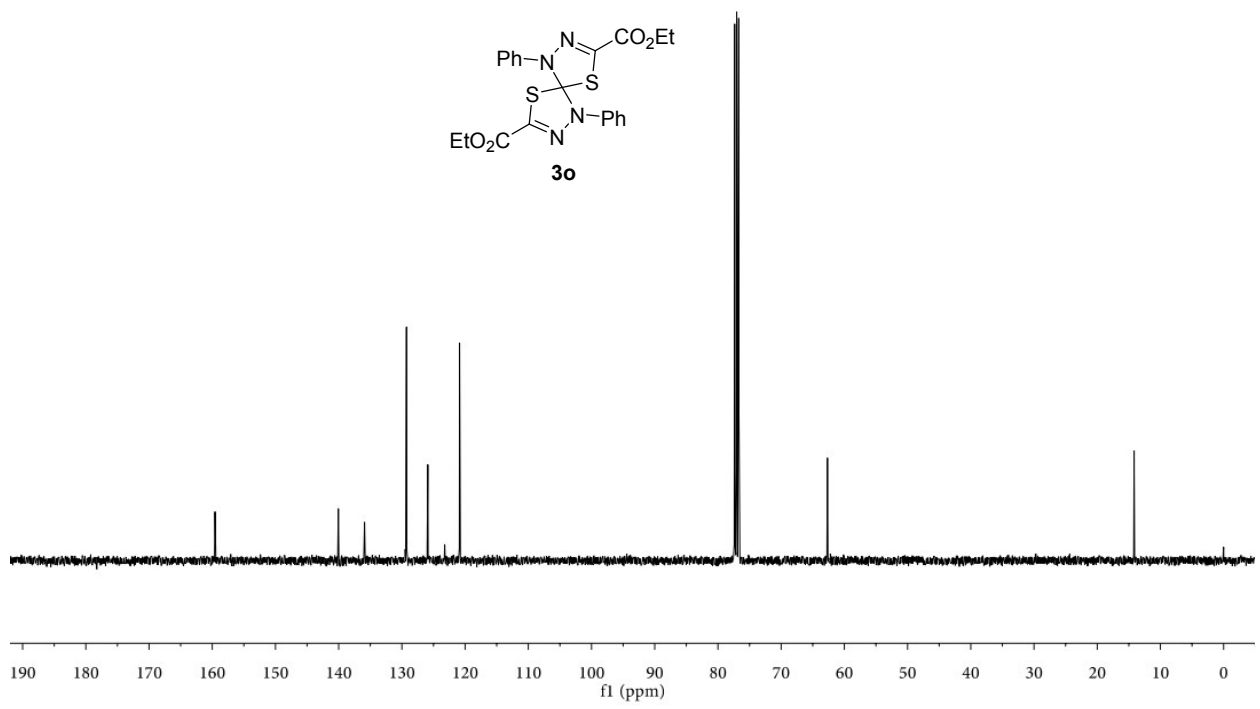

Supplement: d1ra03229a1.pdf [file d1ra03229a1.pdf]
